# Supplementary material for: Feasibility of aerosol drug delivery to sleeping infants: a prospective observational study
Source: PubMed Central journal article supplement — BMJ Open. 2014 Mar 26;4(3):e004124. doi: 10.1136/bmjopen-2013-004124 (PMC3975762; doi:10.1136/bmjopen-2013-004124), 2014-03-26

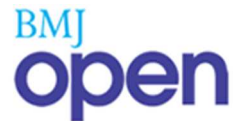

## Feasibility of Aerosol drug delivery to sleeping infants

|                                 |                                                                                                                                                                                                                                                                                                                                                                                                                                                    |
|---------------------------------|----------------------------------------------------------------------------------------------------------------------------------------------------------------------------------------------------------------------------------------------------------------------------------------------------------------------------------------------------------------------------------------------------------------------------------------------------|
| Journal:                        | <i>BMJ Open</i>                                                                                                                                                                                                                                                                                                                                                                                                                                    |
| Manuscript ID:                  | bmjopen-2013-004124                                                                                                                                                                                                                                                                                                                                                                                                                                |
| Article Type:                   | Research                                                                                                                                                                                                                                                                                                                                                                                                                                           |
| Date Submitted by the Author:   | 26-Sep-2013                                                                                                                                                                                                                                                                                                                                                                                                                                        |
| Complete List of Authors:       | Amirav, Israel; University of Alberta, Pediatrics; Bar Ilan University, Faculty of Medicine<br>Newhouse, Michael; Firestone Institute for Respiratory Health, St. Joseph's Hospital, McMaster University, 50 Charlton Ave. East, Hamilton, Ontario,<br>Luder, Anthony; Ziv Medical Center, Pediatrics<br>Halamish, Asaf; Tecnosaf,<br>Omar, Hamza; Ziv Medical Center, Nuclear Medicine<br>Gorenberg, Miguel; Ziv Medical Center, Nuclear Medicine |
| <b>Primary Subject Heading</b>: | Paediatrics                                                                                                                                                                                                                                                                                                                                                                                                                                        |
| Secondary Subject Heading:      | Paediatrics, Pharmacology and therapeutics, Radiology and imaging, Respiratory medicine                                                                                                                                                                                                                                                                                                                                                            |
| Keywords:                       | Paediatric thoracic medicine < PAEDIATRICS, Nuclear radiology < RADIOLOGY & IMAGING, Asthma < THORACIC MEDICINE                                                                                                                                                                                                                                                                                                                                    |
|                                 |                                                                                                                                                                                                                                                                                                                                                                                                                                                    |

SCHOLARONE™  
Manuscripts

## Feasibility of Aerosol drug delivery to sleeping infants

Israel Amirav<sup>1</sup>MD, Michael T. Newhouse<sup>4</sup> MD., MSc, FRCP(C), Anthony Luder<sup>1</sup>MD,  
Asaf Halamish<sup>2</sup>, Hamza Omar<sup>3</sup>, Miguel Gorenberg<sup>3</sup>MD

1. Corresponding author, Pediatric Department, Ziv Medical Center, Faculty of Medicine, Bar-Ilan University, Safed, Israel Phone: 780-8840296, E mail: [amirav@012.net.il](mailto:amirav@012.net.il)
2. Technosaf, Karkur, Israel
3. Nuclear Medicine Department, Ziv Medical Center, Safed,, Israel
4. Firestone Institute for Respiratory Health, St. Joseph's Hospital, McMaster University, Hamilton, Ontario, Canada.

**Short title:** Aerosol delivery during sleep

**Key words:** Aerosol, face-mask, sleep, deposition, compliance

**Funding source:** None

**Financial Disclosure:** Dr. Newhouse is the consulting Chief Medical Officer of InspiRx Inc, developer of the SootherMask®. All other authors have indicated they have no financial relationships relevant to this article to disclose.

**Conflict of Interest:** Israel Amirav and Michael Newhouse have patents rights for devices for delivering aerosols to infants including those in the current study. The other authors have no conflicts of interest relevant to this article to disclose.

**Clinical Trial registry:** NCT01120938

Total word count: 2693

There is no additional data available

### Contributors' Statement

Israel Amirav: Dr. Amirav conceptualized and designed the study, coordinated and supervised data collection, drafted the initial manuscript, reviewed and approved the final manuscript as submitted.

Michael T. Newhouse: Dr. Newhouse was involved in the study design, reviewed and approved the final manuscript as submitted.

Anthony S. Luder: Dr. Luder reviewed and approved the final manuscript as submitted.

Asaf Halamish: Mr. Halamish was involved in the study design, designed the data collection instruments, and coordinated and supervised data collection. He reviewed and approved the final manuscript as submitted.

Hamza Omar: Mr. Omar carried out the nuclear medicine studies and initial analyses, reviewed and approved the final manuscript as submitted.

Miguel Gorenberg: Dr. Gorenberg was involved in the study design, designed the nuclear data collection, reviewed and approved the final manuscript as submitted.

### List of abbreviations

MDI- metered dose inhaler

VHC- valved aerosol holding chamber

DTPA-Diethylene Triamine Pentacetic Acid

SM- SootherMask

IC- InspiraChamber

**Abstract**

**Rationale:** Delivery of inhaled medications to infants is usually very demanding and is often associated with crying and mask rejection. It has been suggested that aerosol administration during sleep may be an attractive alternative. Previous studies in sleeping children were disappointing as most of the children awoke and rejected the treatment.

The SootherMask™ (SM) is a new, gentle and innovative approach for delivering inhaled medication to infants and toddlers. The present pilot study describes the feasibility of administering inhaled medications during sleep using the SM.

**Methods and Results:** Thirteen sleeping infants who regularly used pacifiers and were <12 months old were studied. Right lung aerosol deposition was measured scintigraphically using technetium99mDTPA-labeled normal saline aerosol delivered via a Respimat® (Boehringer Ingelheim, Germany) aerosol generator and SM + InspiraChamber® (IC; InspiRx Inc., New Jersey). All infants who fulfilled the inclusion criteria successfully received the SM treatment during sleep without difficulty. Mean lung deposition ( $\pm$ SD) averaged  $1.6\pm 0.5\%$  in the right lung.

**Conclusions:** This study demonstrated that the combination of Respimat, InspiraChamber® and SootherMask™ was able to administer aerosol therapy to all the sleeping infants who were regular pacifier users. Provision of aerosols during sleep is advantageous since all of the sleeping children accepted the mask and ensuing aerosol therapy under these conditions, in contrast to previous studies that resulted in frequent mask rejection using currently available devices.

Word count: 229

### Strengths

- Delivery of inhaled medications to infants is often associated with crying and mask rejection. Treatment during sleep may be an attractive alternative yet previous studies failed to confirm this suggestion as most of the infants woke up during treatment.
- The present study describes a new way how to overcome these problems during sleep
- Treatment during sleep by means of a special mask which includes the infants' own pacifier, was accepted by all infants with no awakening and improved lung deposition.

### Limitations

- Only infants who regularly use pacifiers were enrolled thus the results may not be generally applicable.
- As the study involved scintigraphy, no control healthy infants were included.

## Introduction

Delivery of inhaled medications to awake infants and toddlers is often very demanding and is frequently associated with considerable crying and rejection of the mask. It was suggested that administration of inhaled medicine during sleep may be an attractive alternative. An *in-vitro* study suggested that since sleep is associated with more regular breathing patterns and lung delivery is greater during sleep this may translate into improved *in vivo* results.[1]

A real life study using pMDI with a VHC in young children a few years ago,[2] provided disappointing results; 69% of the children awoke during aerosol administration, there was poor compliance and negligible benefit. No similar study followed this failure and a recent Canadian report discourages parents from this practice.[3]

The SootherMask® (SM) is a new approach for delivering inhaled medication to infants. The SM utilizes the infant's own pacifier (or the teat of an infant formula bottle), whose nipple is inserted through a slot in the anterior wall of the mask. The infant, sucking on the mask, keeps the mask sealed to its facial contours, by means of sub-atmospheric pressure, with little additional applied force and can nasally inhale the medication generated by means of a nebulizer or from a metered dose inhaler (MDI)+valved aerosol holding chamber (VHC) attached to the SM. By virtue of its design the SM can initially be applied to the face without the VHC or nebulizer attached. The infant can retain the SM for prolonged periods of time and subsequent gentle mating of the VHC with MDI attached or nebulizer rarely upsets the infant. Pilot observations suggested a high degree of acceptance of the SM in sleeping infants who appear to regard it as being no

1  
2  
3 different from their pacifier alone. Caregivers are advised to acclimatize the  
4  
5 infant to the SM by routinely providing the pacifier in the SM instead of using  
6  
7 the pacifier alone.  
8  
9

10 The present study describes the feasibility of administering inhaled medications  
11  
12 during sleep using the SM. Infants, shortly after falling asleep, were given 99m  
13  
14 Tc in normal saline as placebo aerosolized medication using the SM attached to a  
15  
16 VHC and both right lung and total lung deposition were evaluated  
17  
18 scintigraphically.  
19  
20

## 21 22 **Methods**

23  
24 This was part of larger study that explored the relationship between use of  
25  
26 pacifiers and reduction in sudden infant death syndrome mortality  
27  
28 (NCT01120938). The infants received the Respimat- generated radiolabeled  
29  
30 aerosol through a SootherMask attached to a valved holding chamber  
31  
32 (InspiraChamber®[IC]) (InspiRx Inc, NJ USA) and their lung deposition was  
33  
34 measured.  
35  
36

37  
38 Inclusion criteria: Wheezy infants (Age 0-12 months) on intermittent or regular  
39  
40 inhaled therapy at home, and who were regular users of pacifiers (at least two  
41  
42 hours/day of pacifier use per parents' report).  
43  
44

45  
46 Exclusion criteria: Patients whose parents reported histories or symptoms of  
47  
48 airway abnormalities (eg, previous airway surgery, tracheotomy, obstructive  
49  
50 sleep apnoea, snoring, anatomical anomalies of mouth palate nose, pharynx and  
51  
52 trachea) as well as those with chronic cardiopulmonary disease such as  
53  
54 bronchopulmonary dysplasia, congenital heart disease, immune deficiency, or  
55  
56 cystic fibrosis.  
57  
58  
59  
60

1  
2  
3 Procedures:

4  
5  
6  $^{99m}\text{Tc}$  labelled aerosol generated by an MDI (Respimat®, Boehringer  
7  
8 Ingelheim, Ingelheim, Germany) was administered to the infants via the IC+SM.  
9  
10 The Respimat is powered by compressed air produced by means of a spring-  
11  
12 driven piston within a small cylinder and generates a slowly moving aerosol  
13  
14 bolus into the IC. The medication solution reservoir is a multidose plastic  
15  
16 cartridge. We found the Respimat system ideal for this study because it is  
17  
18 possible to readily radio-label the medication solution in the cartridge. For each  
19  
20 trial, the MDI cartridge was filled with 3.0 mL of  $^{99m}\text{Tc}$ -labelled normal saline.  
21  
22  
23 Addition of  $^{99m}\text{Tc}$  has no physical effect on aerosol characteristics.[4]  
24  
25

26  
27 After priming the Respimat by discharging the inhaler 5 times to a hooded  
28  
29 exhaust system, the emitted dose in terms of radioactive counts was measured by  
30  
31 placing bacterial filters over the outlet mouthpiece of the inhaler and firing 5  
32  
33 puffs directly into the filter. The filters were immediately placed in a well counter  
34  
35 (Capintec Ramsey New Jersey, USA) and were tested each morning (X4) for  
36  
37 reproducibility. Infants arrived at the Nuclear Medicine department in the  
38  
39 morning and were fed. The care giver inserted the infant's pacifier into the SM,  
40  
41 the SM was then offered and accepted and they were put down to sleep sucking  
42  
43 on the pacifier nipple in the SM. Treatment commenced within 10 minutes after  
44  
45 the infant fell asleep. The average time from arrival to sleep in this strange  
46  
47 environment ranged between half to one and a half hours. The Respimat was  
48  
49 attached to the back of the IC, and the 'mouthpiece' of the IC was gently  
50  
51 'docked' to the orifice of the SM applied snugly to the infant's face by suction on  
52  
53 the pacifier nipple. Two successive 'puffs' from the Respimat were then fired into  
54  
55 the IC and the mask-VHC-inhaler combination was kept on the infant's face, by  
56  
57  
58  
59  
60



1  
2  
3 the care giver, for one minute. This ensured complete evacuation of the aerosol  
4  
5 from the VHC.[5] The SM+VHC were then removed.  
6  
7

8 Scintigraphic scans of 60 seconds duration were obtained immediately after each  
9  
10 treatment and gamma camera counts (corrected for decay and tissue attenuation)  
11  
12 of both the anterior and the posterior chest were measured as previously reported  
13  
14 [6] and the following regions of interest (ROIs) were evaluated: 1. Upper airway,  
15  
16 2. Stomach and 3. Lungs. Aerosol deposition in each of the areas defined above  
17  
18 was expressed as a percentage of the total amount of radioactivity previously  
19  
20 emitted (2 puffs) from the Respimat.  
21  
22  
23

24 Patients received the treatment in a special room within the nuclear medicine  
25  
26 department, used only for this purpose. No person other than the patient's parent  
27  
28 and physician was allowed in the room. Radioactivity protection monitoring was  
29  
30 carried out regularly and following each study, to ensure that no excess  
31  
32 radioactivity was present in the room following treatments. To avoid  
33  
34 contamination of the infant's chest and the environment during treatment, thus  
35  
36 interfering with lung gamma camera counting, the infant's chest and the VHC  
37  
38 were enclosed in a special disposable large volume nylon wrap.  
39  
40  
41  
42

43 The radiation dose of  $^{99m}\text{Tc}$  aerosol used in this study was calculated according  
44  
45 to the Medical Internal Radiation Dose Committee.[7] The dose of  $^{99m}\text{Tc}$  to be  
46  
47 given to each patient determined before the inhalation procedure was found to be  
48  
49  $15\mu\text{Ci}/\text{kg}$ . [8] As inhalation exposure is 0.05 RAD/mCi, (9) or 0.00075 RAD/Kg,  
50  
51 the maximum exposure for a 20 kg child was 0.015 RAD. It was equivalent to  
52  
53 the radiation received during cosmic-ray exposure of 3 weeks or a 12 hour flight  
54  
55  
56  
57  
58  
59  
60

1  
2  
3 and is much lower than the dose used in diagnostic imaging procedures.  $^{99m}\text{Tc}$   
4  
5 is a pure gamma emitter and has a 6 hour physical half-life.[7]  
6  
7

8 The deposition method suggested here has been in use clinically world-wide for  
9  
10 several decades and has been used in a number of previous paediatric  
11  
12 studies.[6,10] It has regularly received ethical approval in the past and ethics  
13  
14 approval was obtained for this study from the local research committee and the  
15  
16 Ministry of Health in Israel. Parents signed an informed consent.  
17  
18  
19

## 20 **Results**

21  
22  
23 Thirteen infants were enrolled. Ten infants completed the study. Reasons for  
24  
25 non-completion were: One infant did not fall asleep during the observation  
26  
27 period; One infant awoke after completing aerosol administration and due to  
28  
29 excessive movement, image acquisition could not be undertaken, although  
30  
31 aerosol administration had apparently been achieved; The third infant was  
32  
33 subsequently found to be sick with a respiratory illness. She showed abnormally  
34  
35 high deposition in only one lung and was therefore excluded. All the infants  
36  
37 accepted the treatment without rejection and no leaks were observed reflecting a  
38  
39 good mask to face seal.  
40  
41  
42  
43

44 A typical scintigram is shown in Figure 1. The individual deposition results of  
45  
46 the 10 patients are shown in Table 1.  
47  
48

49 Right Lung deposition in all 10 infants ranged between 0.83 to 2.37 % of  
50  
51 delivered dose with a mean value of  $1.61 \pm 0.56$  %. The mean deposition in both  
52  
53 lungs (which includes oesophageal and carinal deposition) was 4.17 %. The  
54  
55 amount of drug deposited in the upper airway averaged 16.7% and in the  
56  
57  
58  
59  
60

1  
2  
3 stomach 1.4%. There was no correlation between deposition and age of the  
4  
5 infants.  
6  
7  
8  
9

## 10 11 **Discussion**

12  
13  
14 The present study demonstrates that aerosol administration in infants during sleep  
15  
16 is a successful way to achieve potentially 'therapeutic' lung deposition when  
17  
18 treatment is accomplished by means of a VHC attached to a calming and  
19  
20 relatively non-intrusive mask such as the SM. All of the infants readily accepted  
21  
22 the treatment with little difficulty and did not awaken, cry or demonstrate fear of  
23  
24 the mask or the subsequent aerosol therapy.  
25  
26

27  
28 Previous studies have stressed the difficulty of delivering inhaled medications to  
29  
30 infants. There are, potentially, both anatomic and physiological reasons for this.  
31  
32 The epiglottis in infants is situated high in the upper respiratory tract (URT) very  
33  
34 close to the base of the infant's tongue,[11] The infant pharynx and supraglottic  
35  
36 tissue areas characteristically are less rigid compared to adults and thus more  
37  
38 susceptible to collapse and obstruction of the URT, particularly during  
39  
40 inspiration. Additionally, the airways of infants are narrower and are prone to  
41  
42 collapse, while tidal volume and flow velocity are relatively low. Currently  
43  
44 available conventional face masks are essentially miniaturized adult masks, with  
45  
46 a relatively large dead space, are poorly contoured, if at all, and require a  
47  
48 considerable external force of more than 1 kg,[12] to apply them snugly to the  
49  
50 infant's face, thus often upsetting the child.[13] The behavioural aspect of  
51  
52 aerosol therapy in infants is most important for achieving adequate delivery of  
53  
54 aerosols to their lungs and they frequently refuse the application of a face mask  
55  
56  
57  
58  
59  
60

1  
2  
3 by attempting to push it away as well as vigorously squirming and crying. Crying  
4  
5 has been shown to greatly reduce lung deposition of inhaled medication to a  
6  
7 negligible fraction of what is considered a therapeutic dose.[6,10,14,15]  
8  
9

10  
11 It was previously suggested, by several investigators, that sleep may provide a  
12  
13 non-threatening opportunity for aerosol administration to infants. Furthermore,  
14  
15 compared to the awake state, sleep is associated with slower and more regular  
16  
17 breathing, and a lower inspiratory flow velocity,[16-18] factors that have been  
18  
19 shown to improve aerosol delivery to the lungs. Administration of inhaled drugs  
20  
21 to infants during sleep may thus be a good alternative, particularly for  
22  
23 uncooperative young children. Murakami [14] demonstrated, in seven sleepy  
24  
25 infants, that scintigraphic deposition of nebulized aerosol appeared significantly  
26  
27 better than when they were wide awake. The mean deposition during sleep  
28  
29 appeared as good as that in co-operative older (3-14 years) awake children.  
30  
31 However sleep was induced by means of sedation, and it was thus not a “real  
32  
33 life” study.  
34  
35  
36  
37

38  
39 In an aerosol ‘therapy’ study, Janssens et al [1] recorded the breathing patterns of  
40  
41 awake and sleeping babies (age  $11 \pm 5.1$  months), then applied the results by  
42  
43 means of a breathing simulator. They captured the delivered aerosol (generated  
44  
45 by MDI and delivered into a VHC) on filters located at the tracheal port of an  
46  
47 infant airway model, the Sophia Anatomical Infant Nose-Throat (SAINT) model.  
48  
49 They showed that treatment during ‘sleep’ greatly improved VHC aerosol  
50  
51 delivery and almost doubled the dose compared to the ‘awake’ state;  $11.3 \pm 3.9$   
52  
53 compared to  $6.5 \pm 3.2 \mu\text{g}$  of a  $200 \mu\text{g}$  total delivered dose (5.5% vs 3.2%).  
54  
55  
56  
57  
58  
59  
60

1  
2  
3 These promising ‘in vitro’ results were somewhat contradicted during attempts to  
4 translate them to real life conditions. Noble et al [19] showed that although mask  
5 VHC aerosol administration during sleep was successful in most of the infants  
6 and toddlers that he studied, a subgroup of 17% of the patients awakened during  
7 the procedure. In a more recent study that assessed the effects of sleep on aerosol  
8 delivery by VHC, it was found that 70% of infants awoke during application of  
9 the mask and 75% of those became distressed and uncooperative. Not  
10 surprisingly, the delivered dose in this study was only about half of that in awake,  
11 cooperative infants.[2] Based on these disappointing studies, a recent Canadian  
12 guideline discourages parents from delivering aerosols to their infants during  
13 sleep.[3]

14  
15  
16  
17  
18  
19  
20  
21  
22  
23  
24  
25  
26  
27  
28 The SM is a new face mask concept that integrates the infant’s own pacifier in  
29 the treatment process. The mask has evidence-based facial contours and an  
30 extremely small dead space (18.2 ml) resulting from 3D computerized face  
31 analysis technology developed with the assistance of the Computer Science  
32 department at Technion University.[20] Infants suck on their pacifier and the rim  
33 of the mask is gently sealed to their face, mainly by suction on the pacifier. We  
34 postulate that the very gentle touch of the contoured mask rim is thus not  
35 considered as intrusive and frightening as currently available masks that require  
36 application of considerable force in order to achieve a good seal and also fail to  
37 provide the calming effect of the infant’s familiar pacifier. We have previously  
38 shown adequate lung deposition when nebulized drug was administered to awake  
39 infants through the SM.[21] Nebulization may require up to 15 min or more of  
40 treatment which may, with current masks, be too long for the infant to tolerate.  
41  
42  
43  
44  
45  
46  
47  
48  
49  
50  
51  
52  
53  
54  
55  
56  
57  
58  
59  
60  
61  
62  
63  
64  
65  
66  
67  
68  
69  
70  
71  
72  
73  
74  
75  
76  
77  
78  
79  
80  
81  
82  
83  
84  
85  
86  
87  
88  
89  
90  
91  
92  
93  
94  
95  
96  
97  
98  
99  
100  
101  
102  
103  
104  
105  
106  
107  
108  
109  
110  
111  
112  
113  
114  
115  
116  
117  
118  
119  
120  
121  
122  
123  
124  
125  
126  
127  
128  
129  
130  
131  
132  
133  
134  
135  
136  
137  
138  
139  
140  
141  
142  
143  
144  
145  
146  
147  
148  
149  
150  
151  
152  
153  
154  
155  
156  
157  
158  
159  
160  
161  
162  
163  
164  
165  
166  
167  
168  
169  
170  
171  
172  
173  
174  
175  
176  
177  
178  
179  
180  
181  
182  
183  
184  
185  
186  
187  
188  
189  
190  
191  
192  
193  
194  
195  
196  
197  
198  
199  
200  
201  
202  
203  
204  
205  
206  
207  
208  
209  
210  
211  
212  
213  
214  
215  
216  
217  
218  
219  
220  
221  
222  
223  
224  
225  
226  
227  
228  
229  
230  
231  
232  
233  
234  
235  
236  
237  
238  
239  
240  
241  
242  
243  
244  
245  
246  
247  
248  
249  
250  
251  
252  
253  
254  
255  
256  
257  
258  
259  
260  
261  
262  
263  
264  
265  
266  
267  
268  
269  
270  
271  
272  
273  
274  
275  
276  
277  
278  
279  
280  
281  
282  
283  
284  
285  
286  
287  
288  
289  
290  
291  
292  
293  
294  
295  
296  
297  
298  
299  
300  
301  
302  
303  
304  
305  
306  
307  
308  
309  
310  
311  
312  
313  
314  
315  
316  
317  
318  
319  
320  
321  
322  
323  
324  
325  
326  
327  
328  
329  
330  
331  
332  
333  
334  
335  
336  
337  
338  
339  
340  
341  
342  
343  
344  
345  
346  
347  
348  
349  
350  
351  
352  
353  
354  
355  
356  
357  
358  
359  
360  
361  
362  
363  
364  
365  
366  
367  
368  
369  
370  
371  
372  
373  
374  
375  
376  
377  
378  
379  
380  
381  
382  
383  
384  
385  
386  
387  
388  
389  
390  
391  
392  
393  
394  
395  
396  
397  
398  
399  
400  
401  
402  
403  
404  
405  
406  
407  
408  
409  
410  
411  
412  
413  
414  
415  
416  
417  
418  
419  
420  
421  
422  
423  
424  
425  
426  
427  
428  
429  
430  
431  
432  
433  
434  
435  
436  
437  
438  
439  
440  
441  
442  
443  
444  
445  
446  
447  
448  
449  
450  
451  
452  
453  
454  
455  
456  
457  
458  
459  
460  
461  
462  
463  
464  
465  
466  
467  
468  
469  
470  
471  
472  
473  
474  
475  
476  
477  
478  
479  
480  
481  
482  
483  
484  
485  
486  
487  
488  
489  
490  
491  
492  
493  
494  
495  
496  
497  
498  
499  
500  
501  
502  
503  
504  
505  
506  
507  
508  
509  
510  
511  
512  
513  
514  
515  
516  
517  
518  
519  
520  
521  
522  
523  
524  
525  
526  
527  
528  
529  
530  
531  
532  
533  
534  
535  
536  
537  
538  
539  
540  
541  
542  
543  
544  
545  
546  
547  
548  
549  
550  
551  
552  
553  
554  
555  
556  
557  
558  
559  
560  
561  
562  
563  
564  
565  
566  
567  
568  
569  
570  
571  
572  
573  
574  
575  
576  
577  
578  
579  
580  
581  
582  
583  
584  
585  
586  
587  
588  
589  
590  
591  
592  
593  
594  
595  
596  
597  
598  
599  
600  
601  
602  
603  
604  
605  
606  
607  
608  
609  
610  
611  
612  
613  
614  
615  
616  
617  
618  
619  
620  
621  
622  
623  
624  
625  
626  
627  
628  
629  
630  
631  
632  
633  
634  
635  
636  
637  
638  
639  
640  
641  
642  
643  
644  
645  
646  
647  
648  
649  
650  
651  
652  
653  
654  
655  
656  
657  
658  
659  
660  
661  
662  
663  
664  
665  
666  
667  
668  
669  
670  
671  
672  
673  
674  
675  
676  
677  
678  
679  
680  
681  
682  
683  
684  
685  
686  
687  
688  
689  
690  
691  
692  
693  
694  
695  
696  
697  
698  
699  
700  
701  
702  
703  
704  
705  
706  
707  
708  
709  
710  
711  
712  
713  
714  
715  
716  
717  
718  
719  
720  
721  
722  
723  
724  
725  
726  
727  
728  
729  
730  
731  
732  
733  
734  
735  
736  
737  
738  
739  
740  
741  
742  
743  
744  
745  
746  
747  
748  
749  
750  
751  
752  
753  
754  
755  
756  
757  
758  
759  
760  
761  
762  
763  
764  
765  
766  
767  
768  
769  
770  
771  
772  
773  
774  
775  
776  
777  
778  
779  
780  
781  
782  
783  
784  
785  
786  
787  
788  
789  
790  
791  
792  
793  
794  
795  
796  
797  
798  
799  
800  
801  
802  
803  
804  
805  
806  
807  
808  
809  
810  
811  
812  
813  
814  
815  
816  
817  
818  
819  
820  
821  
822  
823  
824  
825  
826  
827  
828  
829  
830  
831  
832  
833  
834  
835  
836  
837  
838  
839  
840  
841  
842  
843  
844  
845  
846  
847  
848  
849  
850  
851  
852  
853  
854  
855  
856  
857  
858  
859  
860  
861  
862  
863  
864  
865  
866  
867  
868  
869  
870  
871  
872  
873  
874  
875  
876  
877  
878  
879  
880  
881  
882  
883  
884  
885  
886  
887  
888  
889  
890  
891  
892  
893  
894  
895  
896  
897  
898  
899  
900  
901  
902  
903  
904  
905  
906  
907  
908  
909  
910  
911  
912  
913  
914  
915  
916  
917  
918  
919  
920  
921  
922  
923  
924  
925  
926  
927  
928  
929  
930  
931  
932  
933  
934  
935  
936  
937  
938  
939  
940  
941  
942  
943  
944  
945  
946  
947  
948  
949  
950  
951  
952  
953  
954  
955  
956  
957  
958  
959  
960  
961  
962  
963  
964  
965  
966  
967  
968  
969  
970  
971  
972  
973  
974  
975  
976  
977  
978  
979  
980  
981  
982  
983  
984  
985  
986  
987  
988  
989  
990  
991  
992  
993  
994  
995  
996  
997  
998  
999  
1000

1  
2  
3 (taking into account preparation and cleaning) is considerably shorter (<5 min vs.  
4 >20 min). It has been recently shown that no more than 2-3 breaths are necessary  
5 following each puff to empty the VHC in young children [5] and thus actual  
6 aerosol administration time, after application of the SM, can be as short as 10-15  
7 seconds per puff. The current study is the first to employ the SM in combination  
8 with a MDI+VHC.  
9

10 Lung aerosol deposition in infants treated with MDI+VHC has been studied  
11 infrequently. Tal et al [10] studied 15 infants and young children with airway  
12 obstruction who were given inhaled medications via Aerochamber and mask.  
13 Seven of these were infants under the age of 12 months and their average lung  
14 deposition was 0.77%, approximately half of the present study ( $p<0.01$ ).  
15

16  
17 Respiratory symptoms such as cough and breathlessness in infancy are common  
18 during sleep.[22] The present study supports, not only the use of chronic anti-  
19 inflammatory treatments (inhaled cortico-steroids) during sleep, but also suggests  
20 that the use of acute treatments such as inhaled bronchodilators at the time of an  
21 episode of nocturnal breathlessness and coughing may be rapidly effective,  
22 possibly without awaking the child. Parents can be assured that using this  
23 technique the infants will most likely accept and receive the necessary treatment.  
24 Thus, the use of the SM is more likely than in the past to allow aerosol therapy to  
25 be administered to infants during sleep without awaking them.  
26

27  
28 Furthermore, given the very high success rate with the SM approach,  
29 paediatricians may now more confidently prescribe MDI+VHC+SM to achieve  
30 more rapid and acceptable aerosol therapeutics, instead of providing more  
31 expensive compressor+nebulizer systems and solution vials that involve about 20  
32  
33  
34  
35  
36  
37  
38  
39  
40  
41  
42  
43  
44  
45  
46  
47  
48  
49  
50  
51  
52  
53  
54  
55  
56  
57  
58  
59  
60

1  
2  
3 minutes of administration time from start to finish and the need to clean the  
4  
5 nebulizer after treatment is finished. Use of nebulizers require that a mask be  
6  
7 applied to the face for a much longer period of time which is more likely to  
8  
9 arouse the infant, further adding to the its distress, or the need to resort to the  
10  
11 ‘blow-by’ technique that provides a relatively small and unpredictable dose of  
12  
13 aerosol medication to the child.  
14

15  
16  
17 A limitation of the present study stems from the fact that treatment was given  
18  
19 within 10 minutes of the commencement of sleep. Although we do not have  
20  
21 assessment of sleep stages, this may be a stage during which the child is less  
22  
23 likely to awaken if stimulated by such things as the application of a mask. We see  
24  
25 no reason, however, to suspect that the likelihood of awakening the child will be  
26  
27 greater at even a later stage of deep sleep, although this requires further ‘real-life’  
28  
29 evaluation with sleep stage assessment. Another limitation may be our enrolment  
30  
31 only of infants who regularly use pacifiers and a study in non-pacifier users is  
32  
33 warranted. However, the virtually complete success rate in these ‘suckling’  
34  
35 infants is exceptional and supports the use of sleep as a unique opportunity to  
36  
37 deliver aerosol to infants, particularly to pacifier users by means of the SM.  
38  
39  
40  
41  
42  
43  
44  
45  
46  
47  
48  
49  
50  
51  
52  
53  
54  
55  
56  
57  
58  
59  
60

## References

1. Janssens HM, van der Wiel EC, Verbraak AF et al. Aerosol therapy and the fighting toddler: is administration during sleep an alternative? *J Aerosol Med.* 2003;16(4):395-400.
2. Esposito-Festen J, Ijsselstijn H, Hop W et al. Aerosol therapy by pressured metered-dose inhaler-spacer in sleeping young children: to do or not to do? *Chest.* 2006;130(2):487-92.
3. Smith C, Goldman RD. Nebulizers versus pressurized metered-dose inhalers in preschool children with wheezing. *Can Fam Physician.* 2012;58(5):528-30.
4. Newman SP. Scintigraphic assessment of therapeutic aerosols. *Crit Rev Ther Drug Carrier Syst* 1993;10:65-109.
5. Schultz A, Le Souëf TJ, Venter A et al. Aerosol inhalation from spacers and valved holding chambers requires few tidal breaths for children. *Pediatrics.* 2010;126(6):e1493-8.
6. Amirav I, Balanov I, Gorenberg M, et al. Nebulizer Hood Compared to Mask in Wheezy Infants: Aerosol Therapy Without Tears! , *Arch Dis Child* 2003;88:719-723.
7. Atkins HL, Weber DA, Susskind H et al. MIRD dose estimate report no. 16: radiation absorbed dose from technetium-99m-diethylenetriaminepentaacetic acid aerosol. *J Nucl Med* 1992;33:1717-1719.
8. Eggli DF. Pediatric radiopharmaceutical dosages. In *Clinical Practice of Nuclear Medicine*. Edited by Taylor A and Datz FL. Churchill Livingstone 1991,p450.
9. Becquemin MH, Swift DL, Bouchikhi A et al. Particle deposition and resistance in the noses of adults and children, *Eur. Respir. J* 1991;4: 694–702.
10. Tal A, Golan H, Grauer N, et al. Deposition pattern of radiolabeled salbutamol inhaled from a metered-dose inhaler by means of a spacer with mask in young children with airway obstruction. *J Pediatr* 1996;128:479-484.
11. Sasaki CT, Levine PA, Laitman JT et al. Postnatal descent of the epiglottis in man. A preliminary report. *Arch Otolaryngol.* 1977;103(3):169-71.
12. Shah SA, Berlinski AB, Rubin BK. Force-dependent static dead space of face masks used with holding chambers. *Respir Care* 2006;51:140-4.



- 1  
2  
3 13. Amirav I, Newhouse MT, Review of optimal characteristics of face-masks  
4 for valved-holding chambers (VHCs) *Pediatr Pulmonol.* 2008;43(3):268-74.  
5  
6 14. Murakami G, Igarashi T, Adachi Y et al. Measurement of bronchial  
7 hyperreactivity in infants and preschool children using a new method.  
8 *Ann Allergy* 1990;64:383-7.  
9  
10 15. Iles R, Lister P, Edmunds AT. Crying significantly reduces absorption  
11 of aerosolised drug in infants. *Arch Dis Child* 1999;81:163-165.  
12  
13 16. Morley, C.J., Thornton AJ, Fowler MA et al. Respiratory rate and severity of  
14 illness in babies under 6 months old. *Arch Dis Child* 1990;65:834-7.  
15  
16 17. Marks, M.K., M. South and J.B. Carlin. Reference ranges for respiratory rate  
17 measured by thermistry (12-84 months). *Arch Dis Child* 1993;69:569-72.  
18  
19 18. Rusconi, F., M. Castagneto, L. Gagliardi et al. Reference values for  
20 respiratory rate in the first 3 years of life. *Pediatrics* 1994;94:350-5.  
21  
22 19. Noble V, Ruggins NR, Everard ML et al. Inhaled budesonide for  
23 chronic wheezing under 18 months of age. *Arch Dis Child* 1992;67:285-  
24 288.  
25  
26 20. Newhouse M, Luder A, Chalamish A, et al. Evidence Based Design  
27 Of Face Masks For Children Using Computerized 3d Face Analysis. *Am J*  
28 *Respir Crit Care Med* 2012;185:A5628  
29  
30 21. Amirav I, Luder A, Chleechel A et al. Lung aerosol deposition in suckling  
31 infants. *Arch Dis Child* 2012; 97(6):497-501.  
32  
33 22. Clarisse B, Demattei C, Nikasinovic L et al. Bronchial obstructive  
34 phenotypes in the first year of life among Paris birth cohort infants. *Pediatr*  
35 *Allergy Immunol* 2009;20:126–33.  
36  
37  
38  
39  
40  
41  
42  
43  
44  
45  
46  
47  
48  
49  
50  
51  
52  
53  
54  
55  
56  
57  
58  
59  
60

1  
2  
3  
4  
5  
6  
7  
8  
9  
10  
11  
12  
13  
14  
15  
16  
17  
18  
19  
20  
21  
22  
23  
24  
25  
26  
27  
28  
29  
30  
31  
32  
33  
34  
35  
36  
37  
38  
39  
40  
41  
42  
43  
44  
45  
46  
47  
48  
49  
50  
51  
52  
53  
54  
55  
56  
57  
58  
59  
60

Licence for Publication statement:

The Corresponding Author has the right to grant on behalf of all authors and does grant on behalf of all authors, an exclusive licence (or non-exclusive for government employees) on a worldwide basis to the BMJ Group and co-owners or contracting owning societies (where published by the BMJ Group on their behalf), and its Licensees to permit this article (if accepted) to be published in BMJ Open and any other BMJ Group products and to exploit all subsidiary rights, as set out in our licence

For peer review only

**Table 1**

Individual Deposition values (% of emitted dose)

| <u>Pt. #</u> | <u>Rt.</u><br><u>lung</u> | <u>Both</u><br><u>Lungs</u> | <u>Stomach</u> | <u>Upper</u><br><u>airway</u> |
|--------------|---------------------------|-----------------------------|----------------|-------------------------------|
| 1            | <b>0.99</b>               | 4.16                        | 0.09           | 7.80                          |
| 2            | <b>1.44</b>               | 2.97                        | 0.72           | 16.90                         |
| 3            | <b>0.83</b>               | 2.38                        | 3.29           | 25.84                         |
| 4            | <b>1.94</b>               | 5.26                        | 2.11           | 15.59                         |
| 5            | <b>1.47</b>               | 4.51                        | 1.26           | 9.76                          |
| 6            | <b>2.37</b>               | 6.33                        | 0.80           | 32.81                         |
| 7            | <b>2.29</b>               | 4.88                        | 1.58           | 16.50                         |
| 8            | <b>1.40</b>               | 4.02                        | 1.13           | 8.37                          |
| 9            | <b>1.19</b>               | 2.41                        | 2.52           | 15.01                         |
| 10           | <b>2.23</b>               | 4.75                        | 0.72           | 18.95                         |
| <b>Mean</b>  | <b>1.61</b>               | <b>4.17</b>                 | <b>1.42</b>    | <b>16.75</b>                  |
| SD           | 0.56                      | 1.27                        | 0.97           | 7.81                          |

1  
2  
3  
4  
5  
6  
7  
8  
9  
10  
11  
12  
13  
14  
15  
16  
17  
18  
19  
20  
21  
22  
23  
24  
25  
26  
27  
28  
29  
30  
31  
32  
33  
34  
35  
36  
37  
38  
39  
40  
41  
42  
43  
44  
45  
46  
47  
48  
49  
50  
51  
52  
53  
54  
55  
56  
57  
58  
59  
60

Figures Legend

Figure 1:

A typical scintigram, the green dashed circle denotes the stomach, the blue dots denote upper airways, and solid yellow- right lung.

For peer review only

1  
2  
3  
4  
5  
6  
7  
8  
9  
10  
11  
12  
13  
14  
15  
16  
17  
18  
19  
20  
21  
22  
23  
24  
25  
26  
27  
28  
29  
30  
31  
32  
33  
34  
35  
36  
37  
38  
39  
40  
41  
42  
43  
44  
45  
46  
47  
48  
49  
50  
51  
52  
53  
54  
55  
56  
57  
58  
59  
60

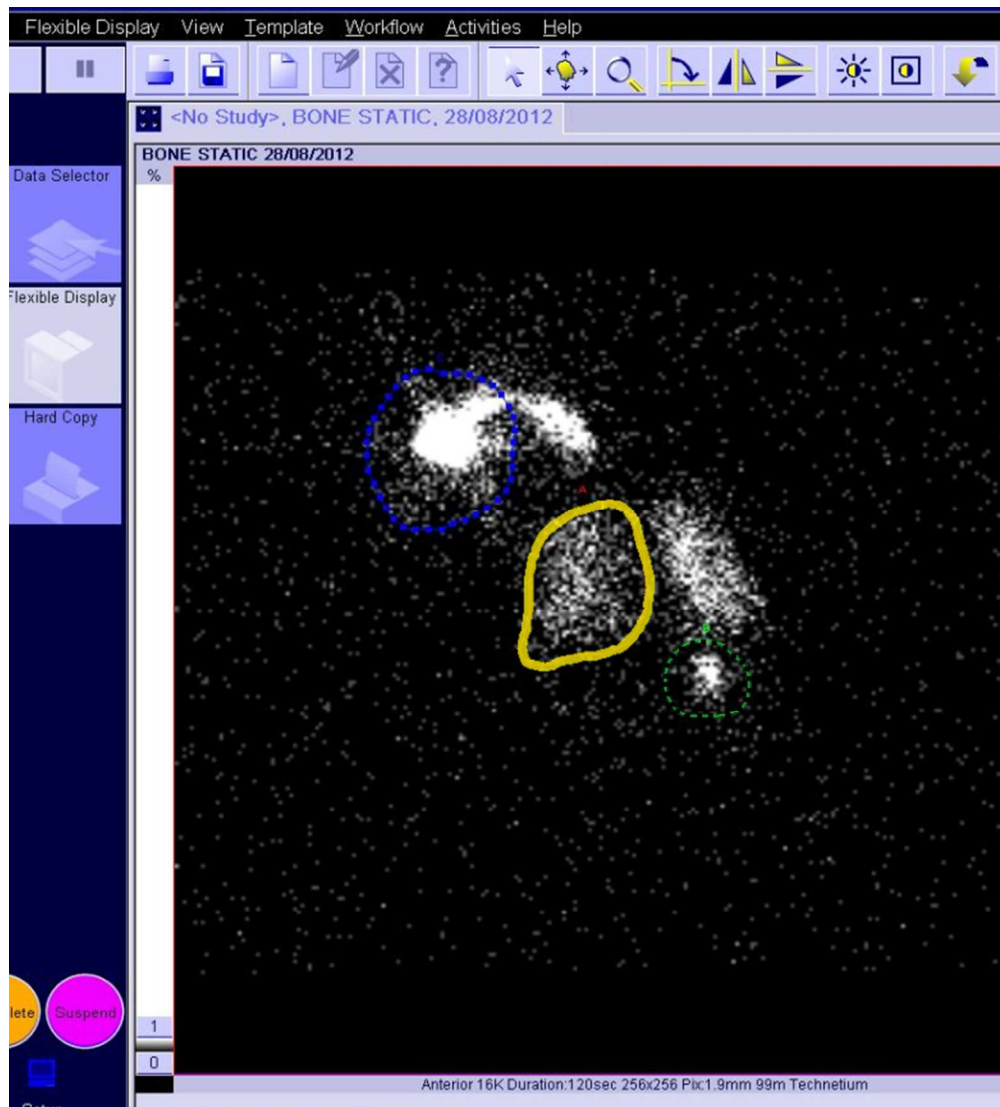

66x73mm (300 x 300 DPI)

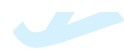



## Feasibility of Aerosol drug delivery to sleeping infants

|                                                                                                                                                                |                                                                                                                                                                                                                                                                                                                                                                                                                                                    |
|----------------------------------------------------------------------------------------------------------------------------------------------------------------|----------------------------------------------------------------------------------------------------------------------------------------------------------------------------------------------------------------------------------------------------------------------------------------------------------------------------------------------------------------------------------------------------------------------------------------------------|
| Journal:                                                                                                                                                       | <i>BMJ Open</i>                                                                                                                                                                                                                                                                                                                                                                                                                                    |
| Manuscript ID:                                                                                                                                                 | bmjopen-2013-004124.R1                                                                                                                                                                                                                                                                                                                                                                                                                             |
| Article Type:                                                                                                                                                  | Research                                                                                                                                                                                                                                                                                                                                                                                                                                           |
| Date Submitted by the Author:                                                                                                                                  | 02-Dec-2013                                                                                                                                                                                                                                                                                                                                                                                                                                        |
| Complete List of Authors:                                                                                                                                      | Amirav, Israel; University of Alberta, Pediatrics; Bar Ilan University, Faculty of Medicine<br>Newhouse, Michael; Firestone Institute for Respiratory Health, St. Joseph's Hospital, McMaster University, 50 Charlton Ave. East, Hamilton, Ontario,<br>Luder, Anthony; Ziv Medical Center, Pediatrics<br>Halamish, Asaf; Tecnosaf,<br>Omar, Hamza; Ziv Medical Center, Nuclear Medicine<br>Gorenberg, Miguel; Ziv Medical Center, Nuclear Medicine |
| <b>Primary Subject Heading</b>:                                                                                                                                | Paediatrics                                                                                                                                                                                                                                                                                                                                                                                                                                        |
| Secondary Subject Heading:                                                                                                                                     | Paediatrics, Pharmacology and therapeutics, Radiology and imaging, Respiratory medicine                                                                                                                                                                                                                                                                                                                                                            |
| Keywords:                                                                                                                                                      | Paediatric thoracic medicine < PAEDIATRICS, Nuclear radiology < RADIOLOGY & IMAGING, Asthma < THORACIC MEDICINE                                                                                                                                                                                                                                                                                                                                    |
| <p>Note: The following files were submitted by the author for peer review, but cannot be converted to PDF. You must view these files (e.g. movies) online.</p> |                                                                                                                                                                                                                                                                                                                                                                                                                                                    |
| <p>Respimate sleep treat email.mp4</p>                                                                                                                         |                                                                                                                                                                                                                                                                                                                                                                                                                                                    |

SCHOLARONE™  
Manuscripts

## Aerosol delivery to infants *without tears*- Back to Sleep!

Israel Amirav<sup>1</sup>MD, Michael T. Newhouse<sup>4</sup> MD., MSc, FRCP(C), Anthony Luder<sup>1</sup>MD,  
Asaf Halamish<sup>2</sup>, Hamza Omar<sup>3</sup>, Miguel Gorenberg<sup>3</sup>MD

1. Corresponding author, Pediatric Department, Ziv Medical Center, Faculty of Medicine, Bar-Ilan University, Safed, Israel Phone: 780-8840296, E mail: [amirav@012.net.il](mailto:amirav@012.net.il)
2. Technosaf, Karkur, Israel
3. Nuclear Medicine Department, Ziv Medical Center, Safed,, Israel
4. Firestone Institute for Respiratory Health, St. Joseph's Hospital, McMaster University, Hamilton, Ontario, Canada.

**Short title:** Aerosol delivery during sleep

**Key words:** Aerosol, face-mask, sleep, deposition, compliance

Total word count: 2479

Word count: **250**

## Abstract

**Rationale:** Delivery of inhaled medications to infants is usually very demanding and is often associated with crying and mask rejection. It has been suggested that aerosol administration during sleep may be an attractive alternative. Previous studies in sleeping children were disappointing as most of the children awoke and rejected the treatment.

The SootherMask™ (SM) is a new, gentle and innovative approach for delivering inhaled medication to infants and toddlers. The present pilot study describes the feasibility of administering inhaled medications during sleep using the SM. The two major outcomes of this study were the acceptability of the treatment and the lung deposition (% of emitted dose)

**Methods and Results:** Thirteen sleeping infants who regularly used pacifiers and were <12 months old were studied. Right lung aerosol deposition was measured scintigraphically using technetium99mDTPA-labeled normal saline aerosol delivered via a Respimat® Soft Mist Inhaler (SMI) (Boehringer Ingelheim, Germany) and SM + InspiraChamber® (IC; InspiRx Inc., New Jersey). All infants who fulfilled the inclusion criteria successfully received the SM treatment during sleep without difficulty. Mean lung deposition ( $\pm$ SD) averaged  $1.6\pm 0.5\%$  in the right lung.

**Conclusions:** This study demonstrated that the combination of Respimat, InspiraChamber® and SootherMask™ was able to administer aerosol therapy to all the sleeping infants who were regular pacifier users with good lung deposition. Provision of aerosols during sleep is advantageous since all of the sleeping children accepted the mask and ensuing aerosol therapy under these conditions, in contrast to previous studies that resulted in frequent mask rejection using currently available devices.



**Strengths**

- Delivery of inhaled medications to infants is often associated with crying and mask rejection. Treatment during sleep may be an attractive alternative yet previous studies failed to confirm this approach as most of the infants awoke during treatment.
- The present study describes a novel approach to overcoming these problems during sleep.
- Treatment during sleep by means of a unique mask which includes the infants' own pacifier, was accepted by all infants with no awakening and improved lung deposition.

**Limitations**

- Only infants who regularly used pacifiers were enrolled, thus these results may not be generally applicable.
- As the study involved scintigraphy, no control healthy infants could be included.

## Introduction

Delivery of inhaled medications to awake infants and toddlers is often very demanding and is frequently associated with considerable crying and rejection of the mask. It was suggested that aerosol therapy during sleep may be an attractive alternative. An *in-vitro* study suggested that since sleep is associated with more regular breathing patterns, and lung targeting of aerosol is greater during sleep, this may translate into improved *in vivo* results.[1]

A previous real life study using a pressurized metered dose inhaler (pMDI) with a valved aerosol holding chamber (VHC) in young children,[2] provided disappointing results; 69% of the children awoke during aerosol administration, there was poor compliance and negligible benefit. No similar study followed this failure and a recent Canadian report discourages parents from this practice.[3]

The SootherMask® (SM) is a novel approach for delivering inhaled medication to infants (4). The SM utilizes the infant's own pacifier (or the teat of an infant formula bottle), whose nipple is inserted through a slot in the anterior wall of the mask. The infant, sucking on the mask, keeps the mask sealed to its facial contours, by means of sub-atmospheric pressure, with little additional applied force and can nasally inhale the medication generated by a nebulizer or from a metered dose inhaler (MDI)+ VHC attached to the SM. By virtue of its design the SM can initially be applied to the face without the VHC or nebulizer attached. The infant can retain the SM for prolonged periods of time and subsequent gentle mating of the VHC with MDI or nebulizer rarely upsets the infant. Pilot observations suggested a high degree of acceptance of the SM in

1  
2  
3 sleeping infants who appear to regard it as being no different from their pacifier  
4  
5 alone.  
6  
7

8 The present study describes the feasibility of administering inhaled medications  
9 during sleep using the SM. Infants, shortly after falling asleep, were given 99m  
10 Tc in normal saline as placebo aerosolized medication using the SM attached to a  
11 VHC and both right lung and total lung deposition were evaluated  
12  
13 scintigraphically. Both acceptability of the treatment and fractional lung  
14  
15 deposition served as the primary outcomes.  
16  
17  
18  
19  
20

## 21 **Methods**

22  
23 This was part of larger study that explored the relationship between use of  
24  
25 pacifiers and reduction in sudden infant death syndrome mortality  
26  
27 (NCT01120938). The infants received the Respimat- generated radiolabeled  
28  
29 aerosol through a SootherMask attached to a valved holding chamber  
30  
31 (InspiraChamber®[IC]) (InspiRx Inc, NJ USA) and their lung aerosol deposition  
32  
33 was measured scintigraphically.  
34  
35  
36  
37

38 Inclusion criteria: Infants (Age 0-12 months) who were prescribed intermittent or  
39  
40 regular inhaled therapy by a paediatric pulmonologist because of recurrent (>3x  
41  
42 within the past 2 months) episodes of wheezing that responded to bronchodilator  
43  
44 treatments, and who were regular users of pacifiers (at least two hours/day of  
45  
46 pacifier use per parents' report). Patients had to be asymptomatic for at least 2  
47  
48 weeks prior to the study. Demographic details are shown in Table 1.  
49  
50

51  
52 Exclusion criteria: Patients whose parents reported a history or symptoms of  
53  
54 airway abnormalities (eg, previous airway surgery, tracheotomy, obstructive  
55  
56 sleep apnoea, snoring, anatomical anomalies of mouth palate nose, pharynx and  
57  
58  
59  
60

1  
2  
3 trachea) as well as those with chronic cardiopulmonary disease such as  
4  
5 bronchopulmonary dysplasia, congenital heart disease, immune deficiency, or  
6  
7 cystic fibrosis.  
8

9  
10 Procedures:

11  
12  
13 99mTc labelled aerosol generated by the Respimat SMI was administered to the  
14  
15 infants via the IC+SM. The Respimat is powered by compressed air produced by  
16  
17 means of a spring-driven piston within a small cylinder and generates a slowly  
18  
19 moving aerosol bolus into the IC. The medication solution reservoir is a  
20  
21 multidose plastic cartridge. We found the Respimat SMI preferable to  
22  
23 pressurized metered dose inhalers (pMDI) because it is possible to readily radio-  
24  
25 label the medication solution in the cartridge. As both pMDI and SMI, would, in  
26  
27 infants, be used with a VHC, the Respimat served as an ideal clinical surrogate.  
28  
29 For each trial, the SMI cartridge was filled with 3.0 mL of 99m Tc-labelled  
30  
31 normal saline. Addition of 99m Tc has no physical effect on aerosol  
32  
33 characteristics.[5]  
34  
35  
36

37  
38 After priming the Respimat by discharging the inhaler 5 times to a hooded  
39  
40 exhaust system the emitted dose in terms of radioactive counts was measured by  
41  
42 placing bacterial filters over the mouthpiece of the SMI and firing 5 puffs  
43  
44 directly into the filter. The filters were immediately placed in a well counter  
45  
46 (Capintec Ramsey New Jersey, USA) and were evaluated each morning (x4) for  
47  
48 reproducibility.  
49  
50

51  
52  
53 Infants arrived at the Nuclear Medicine department in the morning and were fed.  
54  
55 The care-giver inserted the infants' pacifier into the SM which was then offered  
56  
57 and accepted. They were put down to sleep sucking on the pacifier nipple in the  
58  
59  
60

1  
2  
3 SM. Treatment commenced within 10 minutes after the infant fell asleep. The  
4  
5 average time from arrival to sleep in this strange environment ranged between  
6  
7 half and one and a half hour. The RespiMat was inserted into the back of the IC,  
8  
9 and the 'mouthpiece' of the IC was gently 'docked' into the orifice of the SM  
10  
11 sealed to the infant's face by its suction on the pacifier nipple. Two successive  
12  
13 'puffs' from the RespiMat, each followed by one minute of tidal breathing, were  
14  
15 then fired into the IC and the mask-VHC-inhaler combination was kept on the  
16  
17 infant's face, by the care giver, for one minute (see Figure 1 and Video1). This  
18  
19 ensured complete evacuation of the aerosol from the VHC.[6] The SM+VHC  
20  
21 were then removed.  
22  
23  
24

25  
26 The infant was placed supine under a double (anterior and posterior) plate  
27  
28 scanner (Symbia, Siemens GMBH, Munich, Germany) which enabled image  
29  
30 acquisition without moving the infant or the cameras. Scintigraphic scans of 60  
31  
32 seconds duration were obtained and gamma camera counts (corrected for decay  
33  
34 and tissue attenuation) of both the anterior and the posterior chest were measured  
35  
36 as previously reported [7]. Similarly counts were measured for the VHC and  
37  
38 mask to account for all the emitted dose. The tissue attenuation factor was  
39  
40 determined based on our own experience with similar age infants (8). In brief, a  
41  
42 hollow acrylic disc, filled with a solution of a known amount of  $^{99m}\text{Tc}$  (37–74  
43  
44 MBq) served as the flood source. The square root of the ratio of transmission  
45  
46 scan counts obtained without the infant ( $N_0$ ) to the geometric mean of the counts  
47  
48 with the infant ( $N_t$ ) provided the attenuation correction factor ( $\sqrt{N_0/N_t}$ ).

49  
50 The following regions of interest (ROIs) were evaluated: 1. Upper airway, 2.  
51  
52 Stomach and 3. Lungs. Aerosol deposition in each of these regions was  
53  
54  
55  
56  
57  
58  
59  
60

1  
2  
3 expressed as the percent of the total radioactivity previously emitted (2 puffs)  
4  
5 from the Respimat.  
6  
7

8  
9  
10  
11  
12  
13  
14  
15  
16  
17  
18  
19  
20  
21  
22  
23  
24  
25  
26  
27  
28  
29  
30  
31  
32  
33  
34  
35  
36  
37  
38  
39  
40  
41  
42  
43  
44  
45  
46  
47  
48  
49  
50  
51  
52  
53  
54  
55  
56  
57  
58  
59  
60  
Treatments were administered in a special room within the nuclear medicine department, used only for this purpose. Only the patient's parent and physician were allowed in the room. Radioactivity protection monitoring was carried out regularly and following each study, to ensure that no excess radioactivity was present in the room following the treatments. To avoid contamination of the infant's chest and the environment during treatment, which would interfere with lung scintigraphy, the infant's chest and the VHC were enclosed in a special disposable large volume nylon wrap which was removed immediately prior to imaging.

The radiation dose of  $^{99m}\text{Tc}$  aerosol used in this study was calculated according to the Medical Internal Radiation Dose Committee [9]. The dose of  $^{99m}\text{Tc}$  to be given to each patient determined before the inhalation procedure was found to be  $15\mu\text{Ci}/\text{kg}$  [10]. As inhalation exposure is 0.05 RAD/mCi, or 0.00075 RAD/Kg, the maximum exposure for a 20 kg child was 0.015 RAD. This is equivalent to the radiation received during normal cosmic-ray exposure of 3 weeks or a 12 hour flight and is much lower than the dose used in diagnostic imaging procedures.  $^{99m}\text{Tc}$  is a pure gamma emitter and has a 6 hour physical half-life.[9]

The deposition method suggested here has been in use clinically world-wide for several decades and has been used in a number of previous paediatric studies [7,11]. It has regularly received ethics committee approval in the past and approval was obtained for this study from the local hospital research committee

1  
2  
3 (#0007-09-ZIV) and the Ministry of Health in Israel (#920090101). Parents  
4  
5 provided written informed consent.  
6  
7

## 8 **Results**

9

10  
11 Thirteen infants were enrolled. Ten infants completed the study. Reasons for  
12 non-completion were: One infant did not fall asleep during the observation  
13 period; One infant awoke after completing aerosol administration and due to  
14 excessive movement, image acquisition could not be undertaken, although  
15 aerosol administration had apparently been achieved; The third infant was  
16 subsequently found to be sick with a respiratory illness. She showed abnormally  
17 high deposition in only one lung and was therefore excluded. All the infants  
18 accepted the treatment without mask rejection and no leaks were observed  
19 reflecting a good mask to face seal. All infants were asleep flat and supine during  
20 their scintigraphic image acquisition.  
21  
22  
23  
24  
25  
26  
27  
28  
29  
30  
31  
32  
33

34 A typical scintigram is shown in Figure 2. Lung deposition results for the 10  
35 patients are shown in Table 1.  
36  
37  
38

39 Right Lung deposition in all 10 infants ranged between 0.83 and 2.37 % of the  
40 total delivered dose with a mean of  $1.61 \pm 0.56$  %. The mean deposition in both  
41 lungs (which includes oesophageal and carinal deposition) was 4.17 %. The  
42 amount of drug deposited in the upper airway averaged 16.7% and in the  
43 stomach 1.4%. There was no correlation between deposition and age of the  
44 infants.  
45  
46  
47  
48  
49  
50  
51  
52  
53  
54  
55  
56  
57  
58  
59  
60

## Discussion

The present study demonstrates that aerosol administration to infants while asleep is a successful way to achieve potentially 'therapeutic' lung deposition when treatment is accomplished by means of a VHC attached to a calming and relatively non-intrusive mask such as the SM. All of the infants readily accepted the treatment with little difficulty and did not awaken, cry or demonstrate fear of the mask or the subsequent aerosol therapy.

Previous studies have stressed the difficulty of delivering inhaled medications to infants and it has been suggested that sleep may provide a non-threatening opportunity for aerosol administration to them. Furthermore, compared to the awake state, sleep is associated with slower and more regular breathing, and a lower inspiratory flow velocity [1], factors that have been shown to improve aerosol delivery to the lungs. Administration of inhaled medication to infants and toddlers during sleep may thus be a good alternative, particularly if they are uncooperative while awake. Murakami [12] demonstrated, in seven sedated sleepy infants, that scintigraphic deposition of nebulized aerosol appeared significantly better than when they were wide awake. The mean deposition during sleep appeared as good as that in co-operative older (3-14 years) awake children.

In an aerosol 'therapy' study, Janssens et al [1] recorded the breathing patterns of awake and sleeping babies (age  $11 \pm 5.1$  months), then applied the results by means of a breathing simulator. They captured the delivered aerosol (generated by MDI and delivered into a VHC) on filters located at the tracheal port of an infant airway model, the Sophia Anatomical Infant Nose-Throat (SAINT) model.



1  
2  
3 They showed that treatment during 'sleep' greatly improved VHC aerosol  
4 delivery and almost doubled the lung dose compared to the 'awake' state;  $11.3 \pm$   
5  $3.9$  compared to  $6.5 \pm 3.2 \mu\text{g}$  of a  $200 \mu\text{g}$  total delivered dose (5.5% vs 3.2%).  
6  
7  
8

9  
10 These promising 'in vitro' results were somewhat contradicted during attempts to  
11 translate them to real life conditions. Noble et al [13] showed that although mask  
12 VHC aerosol administration during sleep was successful in most of the infants  
13 and toddlers that he studied, a subgroup of 17% of the patients awakened during  
14 the procedure. In a more recent study that assessed the effects of sleep on aerosol  
15 delivery by VHC, it was found that 70% of infants awoke during application of  
16 the mask and 75% of those became distressed and uncooperative. Not  
17 surprisingly, the delivered dose in this study was only about half of that in awake,  
18 cooperative infants.[2] Based on these disappointing studies, a recent Canadian  
19 guideline discourages parents from attempting to deliver aerosols to their infants  
20 during sleep.[3]  
21  
22  
23  
24  
25  
26  
27  
28  
29  
30  
31  
32  
33  
34  
35

36 The SM is a new face mask concept that integrates the infant's *own* pacifier into  
37 the treatment process. The mask has evidence-based facial contours and an  
38 extremely small dead space (18.2 ml) resulting from 3D computerized face  
39 analysis technology developed with the assistance of the Computer Science  
40 department at Technion University [4]. When infants suck on the mask-  
41 integrated pacifier, the rim of the mask becomes gently sealed to their face,  
42 mainly by suction on the pacifier and with minimal, if any, additional applied  
43 force.  
44  
45  
46  
47  
48  
49  
50  
51  
52  
53

54 We postulate that the very gentle touch of the contoured mask rim is thus not  
55 considered as intrusive and frightening as currently available masks that require  
56  
57  
58  
59  
60

1  
2  
3 application of considerable force in order to achieve a good seal [14] and also fail  
4  
5 to provide the calming effect of the infant's familiar pacifier. We have previously  
6  
7 shown adequate lung deposition when nebulized drug was administered to awake  
8  
9 infants through the SM [15]. Nebulization may require up to 15 min or more  
10  
11 which may, with current masks, be too long for the infant to tolerate. Treatment  
12  
13 by VHC+MDI is much faster and less expensive per dose than nebulisation and  
14  
15 the overall duration of therapy (taking into account preparation and cleaning) is  
16  
17 considerably shorter (<5 min vs. >20 min).  
18  
19

20  
21 It has been recently shown that no more than 2-3 breaths are necessary following  
22  
23 each puff to empty the VHC in young children [6] and thus actual aerosol  
24  
25 administration time, after application of the SM, can be as short as 10-15 seconds  
26  
27 per puff. The current study is the first to employ the SM in combination with a  
28  
29 VHC.  
30  
31

32  
33 Respiratory symptoms such as cough and breathlessness in infancy are common  
34  
35 during sleep.[16] The present study supports, not only the use of chronic anti-  
36  
37 inflammatory treatments (e.g. inhaled cortico-steroids) during sleep, but also  
38  
39 suggests that the use of acute treatments such as inhaled bronchodilators at the  
40  
41 time of an episode of nocturnal breathlessness and coughing may be rapidly  
42  
43 effective, possibly without awaking the child. Parents can be assured that using  
44  
45 this technique the infants will most likely accept and receive the necessary  
46  
47 treatment. Thus, the use of the SM is more likely than in the past to allow aerosol  
48  
49 therapy to be administered to infants during sleep without awaking them.  
50  
51

52  
53  
54 Furthermore, given the high success rate with the SM approach, paediatricians  
55  
56 may now more confidently prescribe VHC+SM to achieve more rapid and  
57  
58  
59  
60

1  
2  
3 acceptable aerosol therapeutics, instead of providing more expensive  
4  
5 compressor+nebulizer systems and solution vials that involve about 20 minutes  
6  
7 of administration time and the need to clean the nebulizer after the treatment is  
8  
9 complete. Use of nebulizers requires that a mask be applied to the face for a  
10  
11 much longer period of time which is more likely to arouse the infant, further  
12  
13 adding to the its distress, or the need to resort to the 'blow-by' technique that  
14  
15 provides a relatively small and unpredictable dose of aerosol medication to the  
16  
17  
18  
19  
20  
21  
22  
23  
24  
25  
26  
27  
28  
29  
30  
31  
32  
33  
34  
35  
36  
37  
38  
39  
40  
41  
42  
43  
44  
45  
46  
47  
48  
49  
50  
51  
52  
53  
54  
55  
56  
57  
58  
59  
60

The lack of control subjects using currently available masks is acknowledged as a  
limitation of the present study and a control group was originally incorporated.

However, we felt that it would be unethical and unjustified to expose a control  
group of infants, particularly since several historical scintigraphic studies are  
available. Another limitation may be our enrolment only of infants who regularly  
use pacifiers and a future study in non-pacifier users is certainly warranted.

This pilot study with the SM is, we think, clinically important as it demonstrates  
a unique, innovative and apparently effective approach to providing infants and  
toddlers with aerosol therapy during sleep. It has the potential for encouraging  
pediatricians to use this technique in future clinical studies.

1  
2  
3 **Funding source:** None

4 **Financial Disclosure:** Dr. Newhouse is the consulting Chief Medical Officer of InspiRx Inc,  
5 developer of the SootherMask®. All other authors have indicated they have no financial  
6 relationships relevant to this article to disclose.

7  
8 **Conflict of Interest:** Israel Amirav and Michael Newhouse have patents rights for devices for  
9 delivering aerosols to infants including those in the current study. The other authors have no  
10 conflicts of interest relevant to this article to disclose.

11  
12  
13 **Clinical Trial registry:** NCT01120938

14  
15 **Data Sharing:** There is no additional data avai

16  
17  
18 **Contributors' Statement**

19  
20 Israel Amirav: Dr. Amirav conceptualized and designed the study, coordinated  
21 and supervised data collection, drafted the initial manuscript, reviewed and  
22 approved the final manuscript as submitted.

23  
24 Michael T. Newhouse: Dr. Newhouse was involved in the study design, reviewed  
25 and approved the final manuscript as submitted.

26  
27 Anthony S. Luder: Dr. Luder reviewed and approved the final manuscript as  
28 submitted.

29  
30 Asaf Halamish: Mr. Halamish was involved in the study design, designed the  
31 data collection instruments, and coordinated and supervised data collection. He  
32 reviewed and approved the final manuscript as submitted.

33  
34 Hamza Omar: Mr. Omar carried out the nuclear medicine studies and initial  
35 analyses, reviewed and approved the final manuscript as submitted.

36  
37 Miguel Gorenberg: Dr. Gorenberg was involved in the study design, designed the  
38 nuclear data collection, reviewed and approved the final manuscript as submitted.

39  
40  
41 **List of abbreviations**

42  
43 MDI- metered dose inhaler

44  
45 VHC- valved aerosol holding chamber

46  
47 DTPA-Diethylene Triamine Pentacetic Acid

48  
49 SM- SootherMask

50  
51 IC- InspiraChamber

## References

1. Janssens HM, van der Wiel EC, Verbraak AF et al. Aerosol therapy and the fighting toddler: is administration during sleep an alternative? *J Aerosol Med.* 2003;16(4):395-400.
2. Esposito-Festen J, Ijsselstijn H, Hop W et al. Aerosol therapy by pressured metered-dose inhaler-spacer in sleeping young children: to do or not to do? *Chest.* 2006;130(2):487-92.
3. Smith C, Goldman RD. Nebulizers versus pressurized metered-dose inhalers in preschool children with wheezing. *Can Fam Physician.* 2012;58(5):528-30.
4. Amirav I, Luder AS, Halamish A, Raviv D, Kimmel R, Waisman D, Newhouse MT Design of Aerosol Face Masks for Children Using Computerized 3D Face Analysis. *J Aerosol Med Pulm Drug Deliv.* 2013 Sep 28.
5. Newman SP. Scintigraphic assessment of therapeutic aerosols. *Crit Rev Ther Drug Carrier Syst* 1993;10:65-109.
6. Schultz A, Le Souëf TJ, Venter A et al. Aerosol inhalation from spacers and valved holding chambers requires few tidal breaths for children. *Pediatrics.* 2010;126(6):e1493-8.
7. Amirav I, Balanov I, Gorenberg M, et al. Nebulizer Hood Compared to Mask in Wheezy Infants: Aerosol Therapy Without Tears! , *Arch Dis Child* 2003;88:719-723.
8. Amirav I, Balanov I, Gorenberg M, Luder AS, Newhouse MT, Groshar D. Beta Agonist Aerosol Distribution in RSV Bronchiolitis in Infants. *J Nucl Med,* 2002; 43: 487-491
9. Atkins HL, Weber DA, Susskind H et al. MIRD dose estimate report no. 16: radiation absorbed dose from technetium-99m-diethylenetriaminepentaacetic acid aerosol. *J Nucl Med* 1992;33:1717-1719.
10. Eggli DF. Pediatric radiopharmaceutical dosages. In *Clinical Practice of Nuclear Medicine.* Edited by Taylor A and Datz FL. Churchill Livingstone 1991,p450.
11. Tal A, Golan H, Grauer N, et al. Deposition pattern of radiolabeled salbutamol inhaled from a metered-dose inhaler by means of a spacer with mask in young children with airway obstruction. *J Pediatr* 1996;128:479-484.

- 1  
2  
3 12. Murakami G, Igarashi T, Adachi Y et al. Measurement of bronchial  
4 hyperreactivity in infants and preschool children using a new method.  
5 *Ann Allergy* 1990;64:383-7.  
6  
7  
8 13. Noble V, Ruggins NR, Everard ML et al. Inhaled budesonide for  
9 chronic wheezing under 18 months of age. *Arch Dis Child* 1992;67:285-  
10 288.  
11  
12 14. Shah SA, Berlinski AB, Rubin BK. Force-dependent static dead space of face  
13 masks used with holding chambers. *Respir Care* 2006;51:140-4.  
14  
15 15. Amirav I, Luder A, Chleechel A et al. Lung aerosol deposition in suckling  
16 infants. *Arch Dis Child* 2012; 97(6):497-501.  
17  
18 16. Clarisse B, Demattei C, Nikasinovic L et al. Bronchial obstructive  
19 phenotypes in the first year of life among Paris birth cohort infants. *Pediatr*  
20 *Allergy Immunol* 2009;20:126–33.  
21  
22  
23  
24  
25  
26  
27  
28  
29  
30  
31  
32  
33  
34  
35  
36  
37  
38  
39  
40  
41  
42  
43  
44  
45  
46  
47  
48  
49  
50  
51  
52  
53  
54  
55  
56  
57  
58  
59  
60

1  
2  
3  
4 Licence for Publication statement:  
5

6 The Corresponding Author has the right to grant on behalf of all authors and does  
7 grant on behalf of all authors, an exclusive licence (or non-exclusive for  
8 government employees) on a worldwide basis to the BMJ Group and co-owners  
9 or contracting owning societies (where published by the BMJ Group on their  
10 behalf), and its Licensees to permit this article (if accepted) to be published in  
11 BMJ Open and any other BMJ Group products and to exploit all subsidiary  
12 rights, as set out in our licence  
13  
14  
15  
16  
17  
18  
19  
20  
21  
22  
23  
24  
25  
26  
27  
28  
29  
30  
31  
32  
33  
34  
35  
36  
37  
38  
39  
40  
41  
42  
43  
44  
45  
46  
47  
48  
49  
50  
51  
52  
53  
54  
55  
56  
57  
58  
59  
60

**Table 1**

Individual Deposition values (% of emitted dose)

| <u>Pt. #</u> | <u>Age (m)</u> | <u>Gender</u> | <u>Rt. lung</u> | <u>Both</u>  | <u>Stomach</u> | <u>Upper</u>  |
|--------------|----------------|---------------|-----------------|--------------|----------------|---------------|
|              |                |               |                 | <u>Lungs</u> |                | <u>airway</u> |
| 1            | 6.4            | M             | <b>0.99</b>     | 4.16         | 0.09           | 7.8           |
| 2            | 3.9            | F             | <b>1.44</b>     | 2.97         | 0.72           | 16.9          |
| 3            | 6.4            | M             | <b>0.83</b>     | 2.38         | 3.29           | 25.84         |
| 4            | 7.1            | F             | <b>1.94</b>     | 5.26         | 2.11           | 15.59         |
| 5            | 5.4            | F             | <b>1.47</b>     | 4.51         | 1.26           | 9.76          |
| 6            | 11.7           | M             | <b>2.37</b>     | 6.33         | 0.8            | 32.81         |
| 7            | 5.0            | F             | <b>2.29</b>     | 4.88         | 1.58           | 16.5          |
| 8            | 10.8           | F             | <b>1.4</b>      | 4.02         | 1.13           | 8.37          |
| 9            | 5.4            | M             | <b>1.19</b>     | 2.41         | 2.52           | 15.01         |
| 10           | 5.4            | M             | <b>2.23</b>     | 4.75         | 0.72           | 18.95         |
| Mean         | 9.28           |               | <b>1.61</b>     | 4.17         | 1.42           | 16.75         |
| SD           | 0.68           |               | 0.56            | 1.27         | 0.97           | 7.81          |



1  
2  
3  
4 Figures and Video Legend  
5

6 Figure 1:  
7

8 Photograph illustrating the method of aerosol administration to a sleeping infant  
9 showing the Respimat inhaler, InspiraChamber and SootherMask™  
10  
11

12  
13  
14 Figure 2:  
15

16 A typical scintigram, the green dashed circle denotes the stomach, the blue dots  
17 denote upper airways, and solid yellow- right lung.  
18  
19

20  
21 Video:  
22

23 Video illustrating the method of aerosol administration to a sleeping infant  
24 showing the Respimat inhaler, InspiraChamber and SootherMask™  
25  
26  
27  
28  
29  
30  
31  
32  
33  
34  
35  
36  
37  
38  
39  
40  
41  
42  
43  
44  
45  
46  
47  
48  
49  
50  
51  
52  
53  
54  
55  
56  
57  
58  
59  
60

## Aerosol delivery to infants *without tears*- Back to Sleep!

Israel Amirav<sup>1</sup>MD, Michael T. Newhouse<sup>4</sup> MD., MSc, FRCP(C), Anthony Luder<sup>1</sup>MD,  
Asaf Halamish<sup>2</sup>, Hamza Omar<sup>3</sup>, Miguel Gorenberg<sup>3</sup>MD

1. Corresponding author, Pediatric Department, Ziv Medical Center, Faculty of Medicine, Bar-Ilan University, Safed, Israel Phone: 780-8840296, E mail: [amirav@012.net.il](mailto:amirav@012.net.il)
2. Technosaf, Karkur, Israel
3. Nuclear Medicine Department, Ziv Medical Center, Safed, Israel
4. Firestone Institute for Respiratory Health, St. Joseph's Hospital, McMaster University, Hamilton, Ontario, Canada.

**Short title:** Aerosol delivery during sleep

**Key words:** Aerosol, face-mask, sleep, deposition, compliance

**Funding source:** None

**Financial Disclosure:** Dr. Newhouse is the consulting Chief Medical Officer of InspiRx Inc, developer of the SootherMask®. All other authors have indicated they have no financial relationships relevant to this article to disclose.

**Conflict of Interest:** Israel Amirav and Michael Newhouse have patents rights for devices for delivering aerosols to infants including those in the current study. The other authors have no conflicts of interest relevant to this article to disclose.

**Clinical Trial registry:** NCT01120938

Total word count: 2693

There is no additional data available

### Contributors' Statement

Israel Amirav: Dr. Amirav conceptualized and designed the study, coordinated and supervised data collection, drafted the initial manuscript, reviewed and approved the final manuscript as submitted.

Michael T. Newhouse: Dr. Newhouse was involved in the study design, reviewed and approved the final manuscript as submitted.

Anthony S. Luder: Dr. Luder reviewed and approved the final manuscript as submitted.

Asaf Halamish: Mr. Halamish was involved in the study design, designed the data collection instruments, and coordinated and supervised data collection. He reviewed and approved the final manuscript as submitted.

Hamza Omar: Mr. Omar carried out the nuclear medicine studies and initial analyses, reviewed and approved the final manuscript as submitted.

Miguel Gorenberg: Dr. Gorenberg was involved in the study design, designed the nuclear data collection, reviewed and approved the final manuscript as submitted.

### List of abbreviations

MDI- metered dose inhaler

VHC- valved aerosol holding chamber

DTPA-Diethylene Triamine Pentacetic Acid

SM- SootherMask

IC- InspiraChamber

## Abstract

**Rationale:** Delivery of inhaled medications to infants is usually very demanding and is often associated with crying and mask rejection. It has been suggested that aerosol administration during sleep may be an attractive alternative. Previous studies in sleeping children were disappointing as most of the children awoke and rejected the treatment.

The SootherMask™ (SM) is a new, gentle and innovative approach for delivering inhaled medication to infants and toddlers. The present pilot study describes the feasibility of administering inhaled medications during sleep using the SM. The two major outcomes of this study were the acceptability of the treatment and the lung deposition (% of emitted dose)

**Methods and Results:** Thirteen sleeping infants who regularly used pacifiers and were <12 months old were studied. Right lung aerosol deposition was measured scintigraphically using technetium99mDTPA-labeled normal saline aerosol delivered via a Respimat® Soft Mist Inhaler (SMI) (Boehringer Ingelheim, Germany) ~~aerosol generator~~ and SM + InspiraChamber® (IC; InspiRx Inc., New Jersey). All infants who fulfilled the inclusion criteria successfully received the SM treatment during sleep without difficulty. Mean lung deposition ( $\pm$ SD) averaged  $1.6\pm 0.5\%$  in the right lung.

**Conclusions:** This study demonstrated that the combination of Respimat, InspiraChamber® and SootherMask™ was able to administer aerosol therapy to all the sleeping infants who were regular pacifier users with good lung deposition. Provision of aerosols during sleep is advantageous since all of the sleeping children accepted the mask and ensuing aerosol therapy under these conditions, in contrast to previous studies that resulted in frequent mask rejection using currently available devices.

Word count: 229

### Strengths

- Delivery of inhaled medications to infants is often associated with crying and mask rejection. Treatment during sleep may be an attractive alternative yet previous studies failed to confirm this ~~suggestion~~ approach as most of the infants ~~awoke up~~ during treatment.
- The present study describes a novel approach to ~~overcome~~ overcoming these problems during sleep.
- Treatment during sleep by means of a ~~special~~ unique mask which includes the infants' own pacifier, was accepted by all infants with no awakening and improved lung deposition.

### Limitations

- Only infants who regularly used pacifiers were enrolled, thus these results may not be generally applicable.
- As the study involved scintigraphy, no control healthy infants ~~were~~ could be included.

## Introduction

Delivery of inhaled medications to awake infants and toddlers is often very demanding and is frequently associated with considerable crying and rejection of the mask. It was suggested that ~~administration of inhaled medicine~~ aerosol therapy during sleep may be an attractive alternative. An *in-vitro* study suggested that since sleep is associated with more regular breathing patterns, and lung ~~delivery~~ targeting of aerosol is greater during sleep, this may translate into improved in vivo results.[1]

A previous real life study using a pressurized metered dose inhaler (pMDI) with a valved aerosol holding chamber (VHC) in young children ~~a few years ago~~,[2] provided disappointing results; 69% of the children awoke during aerosol administration, there was poor compliance and negligible benefit. No similar study followed this failure and a recent Canadian report discourages parents from this practice.[3]

The SootherMask® (SM) is a ~~new~~ novel approach for delivering inhaled medication to infants (4). The SM utilizes the infant's own pacifier (or the teat of an infant formula bottle), whose nipple is inserted through a slot in the anterior wall of the mask. The infant, sucking on the mask, keeps the mask sealed to its facial contours, by means of sub-atmospheric pressure, with little additional applied force and can nasally inhale the medication generated by ~~means of a~~ nebulizer or from a metered dose inhaler (MDI) ~~+~~ valved aerosol holding chamber (VHC) attached to the SM. By virtue of its design the SM can initially be applied to the face without the VHC or nebulizer attached. The infant can retain the SM for prolonged periods of time and subsequent gentle mating of the

1  
2  
3  
4  
5  
6 VHC with MDI ~~attached~~ or nebulizer rarely upsets the infant. Pilot observations  
7  
8 suggested a high degree of acceptance of the SM in sleeping infants who appear  
9  
10 to regard it as being no different from their pacifier alone. ~~Caregivers are advised~~  
11  
12 ~~to acclimatize the infant to the SM by routinely providing the pacifier in the SM~~  
13  
14 ~~instead of using the pacifier alone.~~

15  
16 The present study describes the feasibility of administering inhaled medications  
17  
18 during sleep using the SM. Infants, shortly after falling asleep, were given 99m  
19  
20 Tc in normal saline as placebo aerosolized medication using the SM attached to a  
21  
22 VHC and both right lung and total lung deposition were evaluated  
23  
24 scintigraphically. Both acceptability of the treatment and fractional lung  
25  
26 deposition served as the primary outcomes.

## 27 28 29 **Methods**

30  
31 This was part of larger study that explored the relationship between use of  
32  
33 pacifiers and reduction in sudden infant death syndrome mortality  
34  
35 (NCT01120938). The infants received the Respimat- generated radiolabeled  
36  
37 aerosol through a SootherMask attached to a valved holding chamber  
38  
39 (InspiraChamber®[IC]) (InspiRx Inc, NJ USA) and their lung aerosol deposition  
40  
41 was measured scintigraphically. ~~d~~

42  
43 Inclusion criteria: Wheezy ~~I~~infants (Age 0-12 months) ~~on who were~~  
44  
45 intermittent ~~prescribed intermittent~~ or regular inhaled therapy at home by a  
46  
47 paediatric pulmonologist because of recurrent (>3x within the past 2 months)  
48  
49 episodes of wheezing that responded to bronchodilator treatments, and who were  
50  
51 regular users of pacifiers (at least two hours/day of pacifier use per parents’  
52  
53  
54  
55  
56  
57  
58  
59  
60

1  
2  
3  
4  
5  
6 report). Patients had to be asymptomatic for at least 2 weeks prior to the study.

7  
8 Demographic details are shown in Table 1.

9  
10 Exclusion criteria: Patients whose parents reported a histories-history or  
11 symptoms of airway abnormalities (eg, previous airway surgery, tracheotomy,  
12 obstructive sleep apnoea, snoring, anatomical anomalies of mouth palate nose,  
13 pharynx and trachea) as well as those with chronic cardiopulmonary disease such  
14 as bronchopulmonary dysplasia, congenital heart disease, immune deficiency, or  
15 cystic fibrosis.  
16  
17  
18  
19  
20  
21

22  
23 Procedures:

24  
25  
26 99mTc labelled aerosol generated by an MDIthe Respimat SMI (Respimat@,  
27 Boehringer Ingelheim, Ingelheim, Germany) was administered to the infants via  
28 the IC+SM. The Respimat is powered by compressed air produced by means of a  
29 spring-driven piston within a small cylinder and generates a slowly moving  
30 aerosol bolus into the IC. The medication solution reservoir is a multidose plastic  
31 cartridge. We found the Respimat SMI preferable to pressurized metered dose  
32 inhalers (pMDI) system ideal for this study because it is possible to readily  
33 radio-label the medication solution in the cartridge. As both pMDI and SMI,  
34 would, in infants, be used with a VHC, the Respimat served as an ideal clinical  
35 surrogate. For each trial, the SMI cartridge was filled with 3.0 mL of 99m Tc-  
36 labelled normal saline. Addition of 99m Tc has no physical effect on aerosol  
37 characteristics.[45]  
38  
39  
40  
41  
42  
43  
44  
45  
46  
47  
48  
49

50 After priming the Respimat by discharging the inhaler 5 times to a hooded  
51 exhaust system the emitted dose, in terms of radioactive counts, was measured by  
52 placing bacterial filters over the outlet mouthpiece of the inhaler-SMI and firing 5  
53  
54  
55  
56  
57  
58  
59  
60

Formatted: Font: 12 pt

Formatted: Not Highlight

Formatted: Font: 12 pt

Formatted: Font color: Red



1  
2  
3  
4  
5  
6 puffs directly into the filter. The filters were immediately placed in a well counter  
7  
8 (Capintec Ramsey New Jersey, USA) and were ~~tested-evaluated~~ each morning  
9  
10 (~~X4x4~~) for reproducibility.

11  
12 Infants arrived at the Nuclear Medicine department in the morning and were fed.

13  
14 The ~~care-care~~-giver inserted the infant's' pacifier into the SM, ~~the SM which~~ was  
15  
16 then offered and accepted. ~~and they~~ They were put down to sleep sucking on the  
17  
18 pacifier nipple in the SM. Treatment commenced within 10 minutes after the  
19  
20 infant fell asleep. The average time from arrival to sleep in this strange  
21  
22 environment ranged between half ~~to-and~~ one and a half hours. The Respimat was  
23  
24 ~~attached-inserted in~~ to the back of the IC, and the 'mouthpiece' of the IC was  
25  
26 gently 'docked' ~~into~~ the orifice of the SM ~~applied snuglysealed~~ to the infant's  
27  
28 face by ~~its~~ suction on the pacifier nipple. Two successive 'puffs' from the  
29  
30 Respimat, ~~each followed by one minute of tidal breathing,~~ were then fired into  
31  
32 the IC and the mask-VHC-inhaler combination was kept on the infant's face, by  
33  
34 the care giver, for one minute (~~see Figure 1 and Video1~~). This ensured complete  
35  
36 evacuation of the aerosol from the VHC.[56] The SM+VHC were then removed.

37  
38  
39 ~~The infant was placed supine under a double (anterior and posterior) plate~~  
40  
41 ~~scanner (Symbia, Siemens GMBH, Munich, Germany) which enabled image~~  
42  
43 ~~acquisition without moving the infant or the cameras.~~ Scintigraphic scans of 60  
44  
45 seconds duration were obtained ~~immediately after each treatment~~ and gamma  
46  
47 camera counts (corrected for decay and tissue attenuation) of both the anterior  
48  
49 and the posterior chest were measured as previously reported [67]. ~~Similarly~~  
50  
51 ~~counts were measured for the VHC and mask to account for all the emitted dose.~~  
52  
53 ~~The tissue attenuation factor was determined based on our own experience with~~  
54  
55 ~~similar age infants (8). In brief, a hollow acrylic disc, filled with a solution of a~~

Formatted: Line spacing: Double

Formatted: Font color: Dark Blue

1  
2  
3  
4  
5  
6 known amount of 99mTc (37–74 MBq) served as the flood source. The square  
7 root of the ratio of transmission scan counts obtained without the infant (No) to  
8 the geometric mean of the counts with the infant (Nt) provided the attenuation  
9 correction factor ( $\sqrt{No/Nt}$ ).

10  
11  
12  
13  
14 ~~and~~ The following regions of interest (ROIs) were evaluated: 1. Upper airway,  
15 2. Stomach and 3. Lungs. Aerosol deposition in each of these ~~areas~~ regions  
16 ~~defined above~~ was expressed as ~~a~~ the percentage of the total ~~amount of~~  
17 radioactivity previously emitted (2 puffs) from the Respimat.

18  
19  
20  
21  
22 ~~Patients received the treatment~~ Treatments were administered in a special room  
23 within the nuclear medicine department, used only for this purpose. ~~No person~~  
24 ~~other than~~ Only the patient's parent and physician ~~was~~ were allowed in the room.  
25  
26  
27  
28  
29  
30  
31  
32  
33  
34  
35  
36  
37  
38  
39  
40  
41  
42  
43  
44  
45  
46  
47  
48  
49  
50  
51  
52  
53  
54  
55  
56  
57  
58  
59  
60  
Radioactivity protection monitoring was carried out regularly and following each  
study, to ensure that no excess radioactivity was present in the room following  
the treatments. To avoid contamination of the infant's chest and the environment  
during treatment, ~~thus which would interfering~~ interfere with lung ~~gamma~~  
~~camera scintigraphy counting~~, the infant's chest and the VHC were enclosed in a  
special disposable large volume nylon wrap which was removed immediately  
prior to imaging.

The radiation dose of 99m Tc aerosol used in this study was calculated according  
to the Medical Internal Radiation Dose Committee ~~;~~ [79]. The dose of 99m Tc to  
be given to each patient determined before the inhalation procedure was found to  
be  $15 \mu\text{Ci}/\text{kg}$  ~~;~~ [810]. As inhalation exposure is 0.05 RAD/mCi, ~~(9)~~ or 0.00075  
RAD/Kg, the maximum exposure for a 20 kg child was 0.015 RAD. ~~It~~ This was  
is equivalent to the radiation received during normal cosmic-ray exposure of 3

Formatted: Font: (Default) Symbol, 12 pt, English (U.K.)

1  
2  
3  
4  
5  
6 weeks or a 12 hour flight and is much lower than the dose used in diagnostic  
7  
8 imaging procedures.  $^{99m}\text{Tc}$  is a pure gamma emitter and has a 6 hour physical  
9  
10 half-life.<sup>[79]</sup>

11  
12 The deposition method suggested here has been in use clinically world-wide for  
13  
14 several decades and has been used in a number of previous paediatric studies  
15  
16 ~~[-67,4011]~~. It has regularly received ~~ethical-ethics committee~~ approval in the past  
17  
18 and ~~ethics~~ approval was obtained for this study from the local hospital research  
19  
20 committee (#0007-09-ZIV) and the Ministry of Health in Israel (#920090101).  
21  
22 Parents ~~signed-anprovided written~~ informed consent.<sup>23</sup>

Formatted: Font: Italic

## 24 25 Results

26  
27  
28 Thirteen infants were enrolled. Ten infants completed the study. Reasons for  
29  
30 non-completion were: One infant did not fall asleep during the observation  
31  
32 period; One infant awoke after completing aerosol administration and due to  
33  
34 excessive movement, image acquisition could not be undertaken, although  
35  
36 aerosol administration had apparently been achieved; The third infant was  
37  
38 subsequently found to be sick with a respiratory illness. She showed abnormally  
39  
40 high deposition in only one lung and was therefore excluded. All the infants  
41  
42 accepted the treatment without mask rejection and no leaks were observed  
43  
44 reflecting a good mask to face seal. All infants were asleep flat and supine during  
45  
46 their scintigraphic image acquisition.  
47

48  
49 A typical scintigram is shown in Figure ~~12~~. ~~The individual dLung~~ deposition  
50  
51 results ~~of-for~~ the 10 patients are shown in Table 1.  
52  
53  
54  
55  
56  
57  
58  
59  
60

1  
2  
3  
4  
5  
6 Right Lung deposition in all 10 infants ranged between 0.83 ~~to and~~ 2.37 % of the  
7 total delivered dose with a mean ~~value~~ of  $1.61 \pm 0.56$  %. The mean deposition in  
8 both lungs (which includes oesophageal and carinal deposition) was 4.17 %. The  
9 amount of drug deposited in the upper airway averaged 16.7% and in the  
10 stomach 1.4%. There was no correlation between deposition and age of the  
11 infants.  
12  
13  
14  
15  
16  
17  
18  
19  
20

## 21 Discussion

22  
23  
24 The present study demonstrates that aerosol administration ~~in to~~ infants ~~during~~  
25 ~~while asleep sleep~~ is a successful way to achieve potentially 'therapeutic' lung  
26 deposition when treatment is accomplished by means of a VHC attached to a  
27 calming and relatively non-intrusive mask such as the SM. All of the infants  
28 readily accepted the treatment with little difficulty and did not awaken, cry or  
29 demonstrate fear of the mask or the subsequent aerosol therapy.  
30  
31  
32  
33  
34  
35

36 Previous studies have stressed the difficulty of delivering inhaled medications to  
37 infants. ~~There are, potentially, both anatomic and physiological reasons for this.~~  
38 ~~The epiglottis in infants is situated high in the upper respiratory tract (URT) very~~  
39 ~~close to the base of the infant's tongue,[11] The infant pharynx and supraglottic~~  
40 ~~tissue areas characteristically are less rigid compared to adults and thus more~~  
41 ~~susceptible to collapse and obstruction of the URT, particularly during~~  
42 ~~inspiration. Additionally, the airways of infants are narrower and are prone to~~  
43 ~~collapse, while tidal volume and flow velocity are relatively low. Currently~~  
44 ~~available conventional face masks are essentially miniaturized adult masks, with~~  
45 ~~a relatively large dead space, are poorly contoured, if at all, and require a~~  
46  
47  
48  
49  
50  
51  
52  
53  
54  
55

1  
2  
3  
4  
5  
6 considerable external force of more than 1 kg,[12] to apply them snugly to the  
7 infant's face, thus often upsetting the child.[13] The behavioural aspect of  
8 aerosol therapy in infants is most important for achieving adequate delivery of  
9 aerosols to their lungs and they frequently refuse the application of a face mask  
10 by attempting to push it away as well as vigorously squirming and crying. Crying  
11 has been shown to greatly reduce lung deposition of inhaled medication to a  
12 negligible fraction of what is considered a therapeutic dose.[6,10,14,15]

13  
14  
15  
16  
17  
18 It was previously and it has been suggested, by several investigators, that sleep  
19 may provide a non-threatening opportunity for aerosol administration to  
20 infants~~them~~. Furthermore, compared to the awake state, sleep is associated with  
21 slower and more regular breathing, and a lower inspiratory flow velocity,~~[16-~~  
22  
23  
24  
25  
26  
27  
28  
29  
30  
31  
32  
33  
34  
35  
36  
37  
38  
39  
40  
41  
42  
43  
44  
45  
46  
47  
48  
49  
50  
51  
52  
53  
54  
55  
56  
57  
58  
59  
60

Administration of inhaled ~~drugs medication~~ to infants and toddlers during sleep may thus be a good alternative, particularly ~~for if they are~~ uncooperative ~~while awake, young children~~. Murakami [14,12] demonstrated, in seven ~~sedated~~ sleepy infants, that scintigraphic deposition of nebulized aerosol appeared significantly better than when they were wide awake. The mean deposition during sleep appeared as good as that in co-operative older (3-14 years) awake children.

~~However sleep was induced by means of sedation, and it was thus not a "real life" study.~~

In an aerosol 'therapy' study, Janssens et al [1] recorded the breathing patterns of awake and sleeping babies (age  $11 \pm 5.1$  months), then applied the results by means of a breathing simulator. They captured the delivered aerosol (generated by MDI and delivered into a VHC) on filters located at the tracheal port of an infant airway model, the Sophia Anatomical Infant Nose-Throat (SAINT) model.

1  
2  
3  
4  
5  
6 They showed that treatment during 'sleep' greatly improved VHC aerosol  
7 delivery and almost doubled the lung dose compared to the 'awake' state;  $11.3 \pm$   
8  $3.9$  compared to  $6.5 \pm 3.2 \mu\text{g}$  of a  $200 \mu\text{g}$  total delivered dose (5.5% vs 3.2%).  
9

10  
11  
12 These promising 'in vitro' results were somewhat contradicted during attempts to  
13 translate them to real life conditions. Noble et al [1913] showed that although  
14 mask VHC aerosol administration during sleep was successful in most of the  
15 infants and toddlers that he studied, a subgroup of 17% of the patients awakened  
16 during the procedure. In a more recent study that assessed the effects of sleep on  
17 aerosol delivery by VHC, it was found that 70% of infants awoke during  
18 application of the mask and 75% of those became distressed and uncooperative.  
19 Not surprisingly, the delivered dose in this study was only about half of that in  
20 awake, cooperative infants.[2] Based on these disappointing studies, a recent  
21 Canadian guideline discourages parents from attempting to deliver aerosols to  
22 their infants during sleep.[3]  
23  
24  
25  
26  
27  
28  
29  
30  
31  
32  
33  
34

35 The SM is a new face mask concept that integrates the infant's own pacifier into  
36 the treatment process. The mask has evidence-based facial contours and an  
37 extremely small dead space (18.2 ml) resulting from 3D computerized face  
38 analysis technology developed with the assistance of the Computer Science  
39 department at Technion University.[204]. When infants infants suck on their  
40 mask-integrated pacifier, and the rim of the mask is becomes gently sealed to  
41 their face, mainly by suction on the pacifier and with minimal, if any, additional  
42 applied force.  
43  
44  
45  
46  
47  
48  
49  
50  
51

52 We postulate that the very gentle touch of the contoured mask rim is thus not  
53 considered as intrusive and frightening as currently available masks that require  
54  
55

1  
2  
3  
4  
5  
6 application of considerable force ~~in~~ order to achieve a good seal [\[14\]](#) and also  
7  
8 fail to provide the calming effect of the infant's familiar pacifier. We have  
9  
10 previously shown adequate lung deposition when nebulized drug was  
11 administered to awake infants through the SM ~~in~~ [\[2115\]](#). Nebulization may require  
12 up to 15 min or more ~~of treatment~~ which may, with current masks, be too long  
13 for the infant to tolerate. Treatment by VHC+MDI is much ~~quicker~~ faster and  
14 less expensive per dose than nebulisation and the overall duration of ~~the~~ therapy  
15 (taking into account preparation and cleaning) is considerably shorter (<5 min vs.  
16 >20 min).  
17  
18  
19  
20  
21  
22  
23  
24

25 It has been recently shown that no more than 2-3 breaths are necessary following  
26 each puff to empty the VHC in young children [\[56\]](#) and thus actual aerosol  
27 administration time, after application of the SM, can be as short as 10-15 seconds  
28 per puff. The current study is the first to employ the SM in combination with a  
29 MDI+VHC.  
30  
31  
32  
33  
34

35 ~~Lung aerosol deposition in infants treated with MDI+VHC has been studied~~  
36 ~~infrequently. Tal et al [10] studied 15 infants and young children with airway~~  
37 ~~obstruction who were given inhaled medications via Aerochamber and mask.~~  
38 ~~Seven of these were infants under the age of 12 months and their average lung~~  
39 ~~deposition was 0.77%, approximately half of the present study (p<0.01).~~  
40  
41  
42  
43  
44  
45

46 Respiratory symptoms such as cough and breathlessness in infancy are common  
47 during sleep. [\[2216\]](#) The present study supports, not only the use of chronic anti-  
48 inflammatory treatments (e.g. inhaled cortico-steroids) during sleep, but also  
49 suggests that the use of acute treatments such as inhaled bronchodilators at the  
50 time of an episode of nocturnal breathlessness and coughing may be rapidly  
51  
52  
53  
54  
55

1  
2  
3  
4  
5  
6 effective, possibly without awaking the child. Parents can be assured that using  
7  
8 this technique the infants will most likely accept and receive the necessary  
9  
10 treatment. Thus, the use of the SM is more likely than in the past to allow aerosol  
11  
12 therapy to be administered to infants during sleep without awaking them.  
13

14 Furthermore, given the ~~very~~ high success rate with the SM approach,  
15  
16 paediatricians may now more confidently prescribe MDI+VHC+SM to achieve  
17  
18 more rapid and acceptable aerosol therapeutics, instead of providing more  
19  
20 expensive compressor+nebulizer systems and solution vials that involve about 20  
21  
22 minutes of administration time ~~from start to finish~~ and the need to clean the  
23  
24 nebulizer after ~~the~~ treatment is ~~finished~~complete. Use of nebulizers requires that  
25  
26 a mask be applied to the face for a much longer period of time which is more  
27  
28 likely to arouse the infant, further adding to the its distress, or the need to resort  
29  
30 to the 'blow-by' technique that provides a relatively small and unpredictable  
31  
32 dose of aerosol medication to the child.  
33

34  
35 The lack of control subjects using currently available masks is acknowledged as a  
36  
37 limitation of the present study and a control group was originally incorporated.  
38  
39 However, we felt that it would be unethical and unjustified to expose a control  
40  
41 group of infants, particularly since several historical scintigraphic studies are  
42  
43 available.  
44

45  
46 ~~A limitation of the present study stems from the fact that treatment was given~~  
47  
48 ~~within 10 minutes of the commencement of sleep. Although we do not have~~  
49  
50 ~~assessment of sleep stages, this may be a stage during which the child is less~~  
51  
52 ~~likely to awaken if stimulated by such things as the application of a mask. We see~~  
53  
54 ~~no reason, however, to suspect that the likelihood of awakening the child will be~~  
55



1  
2  
3  
4  
5  
6 ~~greater at even a later stage of deep sleep, although this requires further 'real life'~~  
7 ~~evaluation with sleep stage assessment.~~ Another limitation may be our enrolment  
8 only of infants who regularly use pacifiers and a future study in non-pacifier  
9 users is certainly warranted.  
10

11  
12  
13  
14 This pilot study with the SM is, we think, clinically important as it demonstrates  
15 a unique, innovative and apparently effective approach to providing infants and  
16 toddlers with aerosol therapy during sleep. It has the potential for encouraging  
17 pediatricians to use this technique in future clinical studies. However, the virtually  
18 complete success rate in these 'suckling' infants is exceptional and supports the  
19 use of sleep as a unique opportunity to deliver aerosol to infants, particularly to  
20 pacifier users by means of the SM.  
21  
22  
23  
24  
25  
26  
27  
28  
29  
30  
31  
32  
33  
34  
35  
36  
37  
38  
39  
40  
41  
42  
43  
44  
45  
46  
47  
48  
49  
50  
51  
52  
53  
54  
55  
56  
57  
58  
59  
60

## References

1. Janssens HM, van der Wiel EC, Verbraak AF et al. Aerosol therapy and the fighting toddler: is administration during sleep an alternative? *J Aerosol Med*. 2003;16(4):395-400.
2. Esposito-Festen J, Ijsselstijn H, Hop W et al. Aerosol therapy by pressured metered-dose inhaler-spacer in sleeping young children: to do or not to do? *Chest*. 2006;130(2):487-92.
3. Smith C, Goldman RD. Nebulizers versus pressurized metered-dose inhalers in preschool children with wheezing. *Can Fam Physician*. 2012;58(5):528-30.
4. [Amirav I, Luder AS, Halamish A, Raviv D, Kimmel R, Waisman D, Newhouse MT Design of Aerosol Face Masks for Children Using Computerized 3D Face Analysis. \*J Aerosol Med Pulm Drug Deliv\*. 2013 Sep 28.](#)
45. Newman SP. Scintigraphic assessment of therapeutic aerosols. *Crit Rev Ther Drug Carrier Syst* 1993;10:65-109.
56. Schultz A, Le Souëf TJ, Venter A et al. Aerosol inhalation from spacers and valved holding chambers requires few tidal breaths for children. *Pediatrics*. 2010;126(6):e1493-8.
67. Amirav I, Balanov I, Gorenberg M, et al. Nebulizer Hood Compared to Mask in Wheezy Infants: Aerosol Therapy Without Tears! , *Arch Dis Child* 2003;88:719-723.
8. [Amirav I, Balanov I, Gorenberg M, Luder AS, Newhouse MT, Groshar D. Beta Agonist Aerosol Distribution in RSV Bronchiolitis in Infants. \*J Nucl Med\*. 2002; 43: 487-491](#)
79. Atkins HL, Weber DA, Susskind H et al. MIRD dose estimate report no. 16: radiation absorbed dose from technetium-99m-diethylenetriaminepentaacetic acid aerosol. *J Nucl Med* 1992;33:1717-1719.
810. Egli DF. Pediatric radiopharmaceutical dosages. In *Clinical Practice of Nuclear Medicine*. Edited by Taylor A and Datz FL. Churchill Livingstone 1991,p450.
9. ~~Beequemin MH, Swift DL, Bouchikhi A et al. Partiele deposition and resistance in the noses of adults and children, *Eur. Respir. J* 1991;4: 694-702.~~

Formatted: Indent: Left: 0"

1  
2  
3  
4  
5  
6 ~~1011~~. Tal A, Golan H, Grauer N, et al. Deposition pattern of radiolabeled  
7 salbutamol inhaled from a metered-dose inhaler by means of a spacer  
8 with mask in young children with airway obstruction. *J Pediatr*  
9 1996;128:479-484.

10  
11 12. Murakami G, Igarashi T, Adachi Y et al. Measurement of bronchial  
12 hyperreactivity in infants and preschool children using a new method.  
13 *Ann Allergy* 1990;64:383-7.

14  
15 13. Noble V, Ruggins NR, Everard ML et al. Inhaled budesonide for  
16 chronic wheezing under 18 months of age. *Arch Dis Child* 1992;67:285-  
17 288.

18  
19 ~~11. Sasaki CT, Levine PA, Laitman JT et al. Postnatal descent of the~~  
20 ~~epiglottis in man. A preliminary report. *Arch Otolaryngol.*~~  
21 ~~1977;103(3):169-71.~~

22  
23 ~~1214~~. Shah SA, Berlinski AB, Rubin BK. Force-dependent static dead space of  
24 face masks used with holding chambers. *Respir Care* 2006;51:140-4.

25  
26 15. Amirav I, Luder A, Chleechel A et al. Lung aerosol deposition in suckling  
27 infants. *Arch Dis Child* 2012; 97(6):497-501.

28  
29 16. Clarisse B, Demattei C, Nikasinovic L et al. Bronchial obstructive  
30 phenotypes in the first year of life among Paris birth cohort infants. *Pediatr*  
31 *Allergy Immunol* 2009;20:126-33.

32  
33 ~~13. Amirav I, Newhouse MT, Review of optimal characteristics of face masks~~  
34 ~~for valved holding chambers (VHCs) *Pediatr Pulmonol.* 2008;43(3):268-74.~~

35  
36 14. Murakami G, Igarashi T, Adachi Y et al. Measurement of bronchial  
37 hyperreactivity in infants and preschool children using a new method.  
38 *Ann Allergy* 1990;64:383-7.

39  
40 ~~15. Hes R, Lister P, Edmunds AT. Crying significantly reduces absorption~~  
41 ~~of aerosolised drug in infants. *Arch Dis Child* 1999;81:163-165.~~

42  
43 ~~16. Morley, C.J., Thornton AJ, Fowler MA et al. Respiratory rate and severity of~~  
44 ~~illness in babies under 6 months old. *Arch Dis Child* 1990;65:834-7.~~

45  
46 ~~17. Marks, M.K., M. South and J.B. Carlin. Reference ranges for respiratory rate~~  
47 ~~measured by thermistry (12-84 months). *Arch Dis Child* 1993;69:569-72.~~

48  
49 ~~18. Ruseoni, F., M. Castagneto, L. Gagliardi et al. Reference values for~~  
50 ~~respiratory rate in the first 3 years of life. *Pediatrics* 1994;94:350-5.~~

51  
52 19. Noble V, Ruggins NR, Everard ML et al. Inhaled budesonide for  
53 chronic wheezing under 18 months of age. *Arch Dis Child* 1992;67:285-  
54 288.

1  
2  
3  
4  
5  
6 | 20. Newhouse M, Luder A, Chalamish A, et al. Evidence Based Design  
7 | Of Face Masks For Children Using Computerized 3d Face Analysis. *Am J*  
8 | *Respir Crit Care Med* 2012;185:A56287

9  
10 | 21. Amirav I, Luder A, Chleechel A et al. Lung aerosol deposition in suckling  
11 | infants. *Arch Dis Child* 2012; 97(6):497-501.

12  
13 | 22. Clarisse B, Demattei C, Nikasinovic L et al. Bronchial obstructive  
14 | phenotypes in the first year of life among Paris birth cohort infants. *Pediatr*  
15 | *Allergy Immunol* 2009;20:126-33.

1  
2  
3  
4  
5  
6  
7  
8  
9  
10  
11  
12  
13  
14  
15  
16  
17  
18  
19  
20  
21  
22  
23  
24  
25  
26  
27  
28  
29  
30  
31  
32  
33  
34  
35  
36  
37  
38  
39  
40  
41  
42  
43  
44  
45  
46  
47  
48  
49  
50  
51  
52  
53  
54  
55  
56  
57  
58  
59  
60

Licence for Publication statement:

The Corresponding Author has the right to grant on behalf of all authors and does grant on behalf of all authors, an exclusive licence (or non-exclusive for government employees) on a worldwide basis to the BMJ Group and co-owners or contracting owning societies (where published by the BMJ Group on their behalf), and its Licensees to permit this article (if accepted) to be published in BMJ Open and any other BMJ Group products and to exploit all subsidiary rights, as set out in our licence

For peer review only

**Table 1**

Individual Deposition values (% of emitted dose)

| <u>Pt.#</u> | <u>Rt. lung</u> | <u>Both Lungs</u> | <u>Stomach</u> | <u>Upper airway</u> |
|-------------|-----------------|-------------------|----------------|---------------------|
| 1           | 0.99            | 4.16              | 0.09           | 7.80                |
| 2           | 1.44            | 2.97              | 0.72           | 16.90               |
| 3           | 0.83            | 2.38              | 3.29           | 25.84               |
| 4           | 1.94            | 5.26              | 2.11           | 15.59               |
| 5           | 1.47            | 4.51              | 1.26           | 9.76                |
| 6           | 2.37            | 6.33              | 0.80           | 32.81               |
| 7           | 2.29            | 4.88              | 1.58           | 16.50               |
| 8           | 1.40            | 4.02              | 1.13           | 8.37                |
| 9           | 1.19            | 2.41              | 2.52           | 15.01               |
| 10          | 2.23            | 4.75              | 0.72           | 18.95               |
| <b>Mean</b> | <b>1.61</b>     | <b>4.17</b>       | <b>1.42</b>    | <b>16.75</b>        |
| <b>SD</b>   | <b>0.56</b>     | <b>1.27</b>       | <b>0.97</b>    | <b>7.81</b>         |

  

| <u>Pt. #</u> | <u>Age (m)</u> | <u>Gender</u> | <u>Rt. lung</u> | <u>Both Lungs</u> | <u>Stomach</u> | <u>Upper airway</u> |
|--------------|----------------|---------------|-----------------|-------------------|----------------|---------------------|
| 1            | 6.4            | M             | 0.99            | 4.16              | 0.09           | 7.8                 |
| 2            | 3.9            | F             | 1.44            | 2.97              | 0.72           | 16.9                |
| 3            | 6.4            | M             | 0.83            | 2.38              | 3.29           | 25.84               |
| 4            | 7.1            | F             | 1.94            | 5.26              | 2.11           | 15.59               |

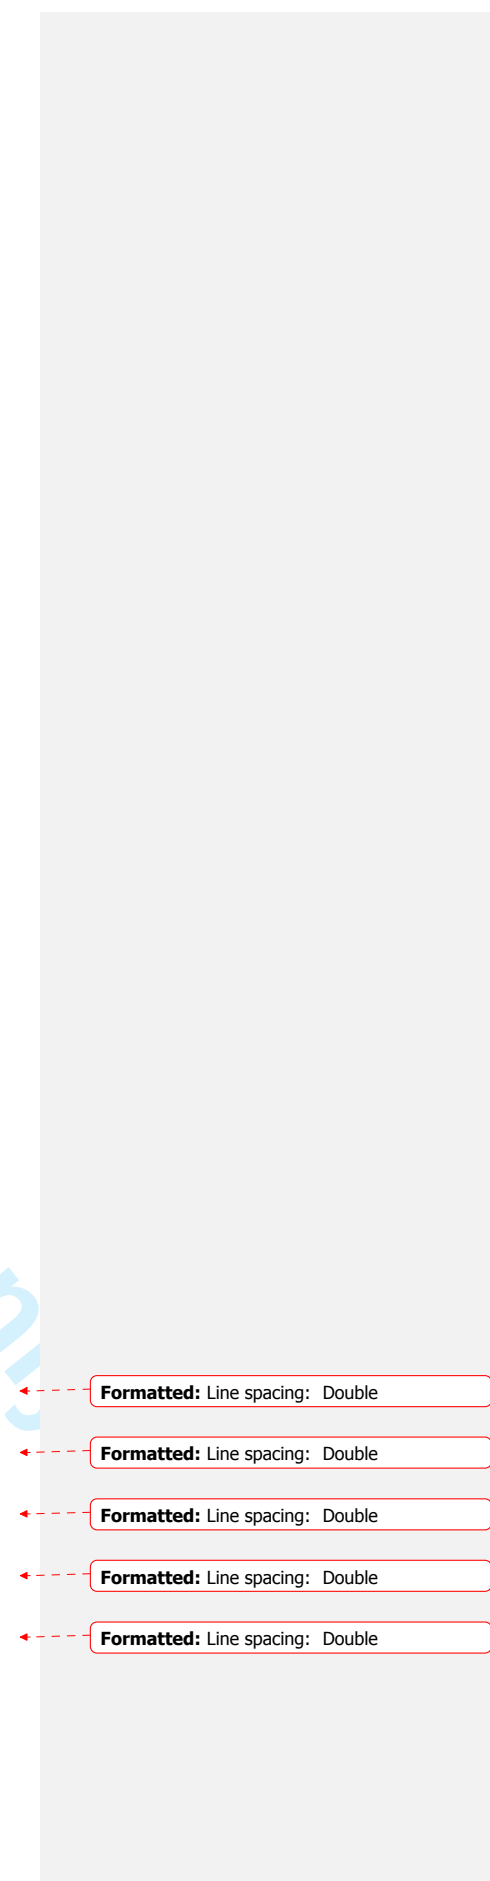

Formatted: Line spacing: Double

1  
2  
3  
4  
5  
6  
7  
8  
9  
10  
11  
12  
13  
14  
15  
16  
17  
18  
19  
20  
21  
22  
23  
24  
25  
26  
27  
28  
29  
30  
31  
32  
33  
34  
35  
36  
37  
38  
39  
40  
41  
42  
43  
44  
45  
46  
47  
48  
49  
50  
51  
52  
53  
54  
55  
56  
57  
58  
59  
60

1  
2  
3  
4  
5  
6  
7  
8  
9  
10  
11  
12  
13  
14  
15  
16  
17  
18  
19  
20  
21  
22  
23  
24  
25  
26  
27  
28  
29  
30  
31  
32  
33  
34  
35  
36  
37  
38  
39  
40  
41  
42  
43  
44  
45  
46  
47  
48  
49  
50  
51  
52  
53  
54  
55  
56  
57  
58  
59  
60

|             |             |          |             |             |             |              |                                 |
|-------------|-------------|----------|-------------|-------------|-------------|--------------|---------------------------------|
| <u>5</u>    | <u>5.4</u>  | <u>F</u> | <u>1.47</u> | <u>4.51</u> | <u>1.26</u> | <u>9.76</u>  | Formatted: Line spacing: Double |
| <u>6</u>    | <u>11.7</u> | <u>M</u> | <u>2.37</u> | <u>6.33</u> | <u>0.8</u>  | <u>32.81</u> | Formatted: Line spacing: Double |
| <u>7</u>    | <u>5.0</u>  | <u>F</u> | <u>2.29</u> | <u>4.88</u> | <u>1.58</u> | <u>16.5</u>  | Formatted: Line spacing: Double |
| <u>8</u>    | <u>10.8</u> | <u>F</u> | <u>1.4</u>  | <u>4.02</u> | <u>1.13</u> | <u>8.37</u>  | Formatted: Line spacing: Double |
| <u>9</u>    | <u>5.4</u>  | <u>M</u> | <u>1.19</u> | <u>2.41</u> | <u>2.52</u> | <u>15.01</u> | Formatted: Line spacing: Double |
| <u>10</u>   | <u>5.4</u>  | <u>M</u> | <u>2.23</u> | <u>4.75</u> | <u>0.72</u> | <u>18.95</u> | Formatted: Line spacing: Double |
| <u>Mean</u> | <u>9.28</u> |          | <u>1.61</u> | <u>4.17</u> | <u>1.42</u> | <u>16.75</u> |                                 |
| <u>SD</u>   | <u>0.68</u> |          | <u>0.56</u> | <u>1.27</u> | <u>0.97</u> | <u>7.81</u>  |                                 |

For peer review only

1  
2  
3  
4  
5  
6  
7  
8  
9  
10  
11  
12  
13  
14  
15  
16  
17  
18  
19  
20  
21  
22  
23  
24  
25  
26  
27  
28  
29  
30  
31  
32  
33  
34  
35  
36  
37  
38  
39  
40  
41  
42  
43  
44  
45  
46  
47  
48  
49  
50  
51  
52  
53  
54  
55  
56  
57  
58  
59  
60

Figures Legend

Figure 1:

Photograph illustrating the method of aerosol administration to a sleeping infant showing the Respimat inhaler, InspiraChamber and SootherMask™

Figure ~~1~~2:

A typical scintigram, the green dashed circle denotes the stomach, the blue dots denote upper airways, and solid yellow- right lung.



1  
2  
3  
4  
5  
6  
7  
8  
9  
10  
11  
12  
13  
14  
15  
16  
17  
18  
19  
20  
21  
22  
23  
24  
25  
26  
27  
28  
29  
30  
31  
32  
33  
34  
35  
36  
37  
38  
39  
40  
41  
42  
43  
44  
45  
46  
47  
48  
49  
50  
51  
52  
53  
54  
55  
56  
57  
58  
59  
60

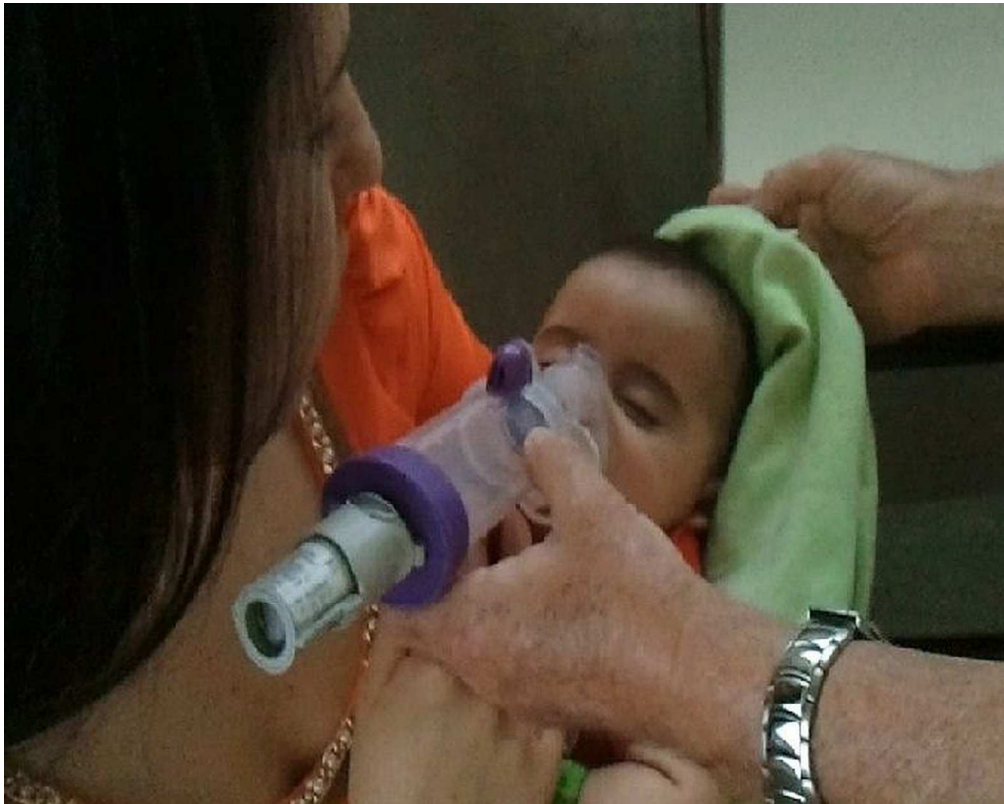

112x90mm (300 x 300 DPI)

ew only

1  
2  
3  
4  
5  
6  
7  
8  
9  
10  
11  
12  
13  
14  
15  
16  
17  
18  
19  
20  
21  
22  
23  
24  
25  
26  
27  
28  
29  
30  
31  
32  
33  
34  
35  
36  
37  
38  
39  
40  
41  
42  
43  
44  
45  
46  
47  
48  
49  
50  
51  
52  
53  
54  
55  
56  
57  
58  
59  
60

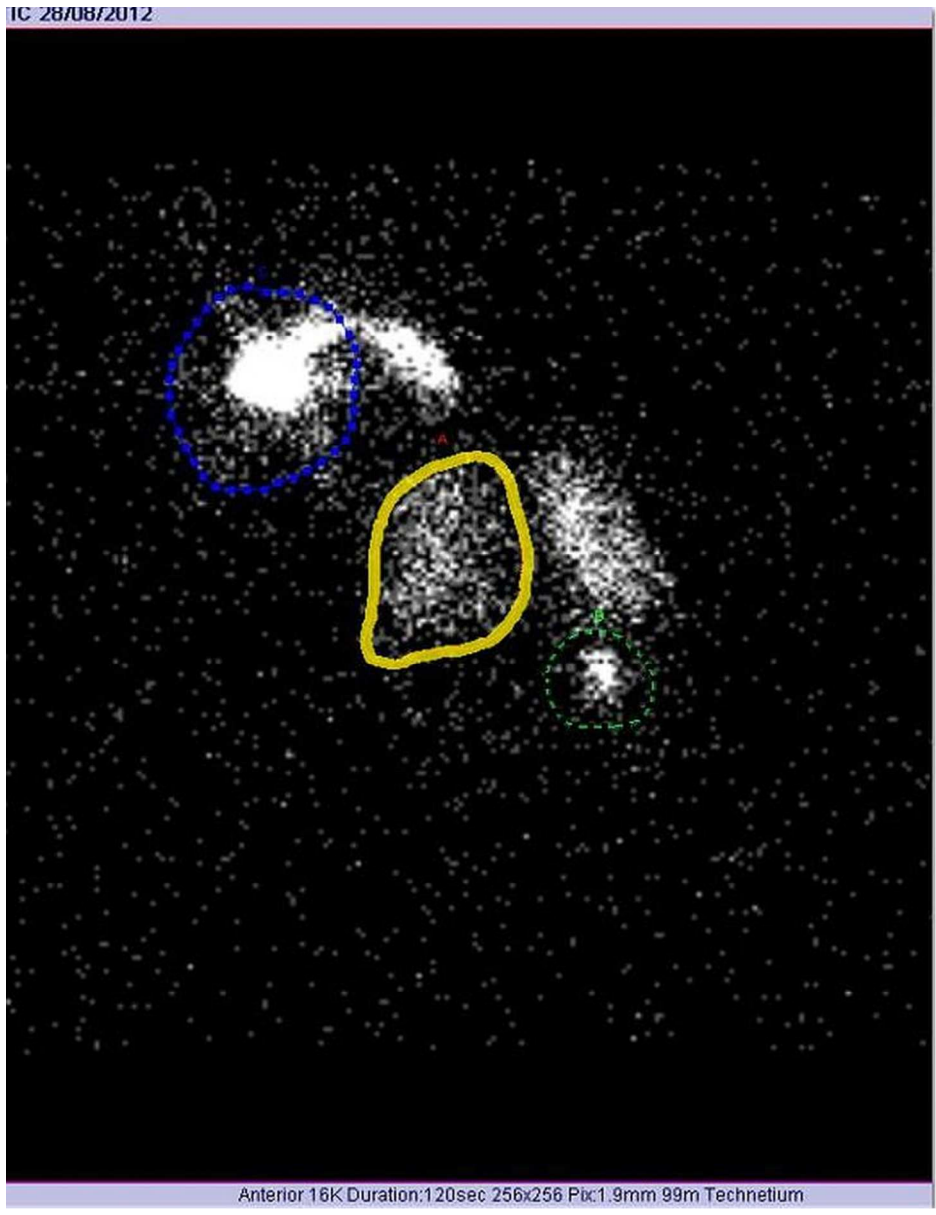

69x90mm (300 x 300 DPI)



## Feasibility of Aerosol drug delivery to sleeping infants

|                                                                                                                                                                |                                                                                                                                                                                                                                                                                                                                                                                                                                                    |
|----------------------------------------------------------------------------------------------------------------------------------------------------------------|----------------------------------------------------------------------------------------------------------------------------------------------------------------------------------------------------------------------------------------------------------------------------------------------------------------------------------------------------------------------------------------------------------------------------------------------------|
| Journal:                                                                                                                                                       | <i>BMJ Open</i>                                                                                                                                                                                                                                                                                                                                                                                                                                    |
| Manuscript ID:                                                                                                                                                 | bmjopen-2013-004124.R2                                                                                                                                                                                                                                                                                                                                                                                                                             |
| Article Type:                                                                                                                                                  | Research                                                                                                                                                                                                                                                                                                                                                                                                                                           |
| Date Submitted by the Author:                                                                                                                                  | 18-Feb-2014                                                                                                                                                                                                                                                                                                                                                                                                                                        |
| Complete List of Authors:                                                                                                                                      | Amirav, Israel; University of Alberta, Pediatrics; Bar Ilan University, Faculty of Medicine<br>Newhouse, Michael; Firestone Institute for Respiratory Health, St. Joseph's Hospital, McMaster University, 50 Charlton Ave. East, Hamilton, Ontario,<br>Luder, Anthony; Ziv Medical Center, Pediatrics<br>Halamish, Asaf; Tecnosaf,<br>Omar, Hamza; Ziv Medical Center, Nuclear Medicine<br>Gorenberg, Miguel; Ziv Medical Center, Nuclear Medicine |
| <b>Primary Subject Heading</b>:                                                                                                                                | Paediatrics                                                                                                                                                                                                                                                                                                                                                                                                                                        |
| Secondary Subject Heading:                                                                                                                                     | Pharmacology and therapeutics, Radiology and imaging, Respiratory medicine                                                                                                                                                                                                                                                                                                                                                                         |
| Keywords:                                                                                                                                                      | Paediatric thoracic medicine < PAEDIATRICS, Nuclear radiology < RADIOLOGY & IMAGING, Asthma < THORACIC MEDICINE                                                                                                                                                                                                                                                                                                                                    |
| <p>Note: The following files were submitted by the author for peer review, but cannot be converted to PDF. You must view these files (e.g. movies) online.</p> |                                                                                                                                                                                                                                                                                                                                                                                                                                                    |
| <p>Respimate sleep treat email.mp4</p>                                                                                                                         |                                                                                                                                                                                                                                                                                                                                                                                                                                                    |

SCHOLARONE™  
Manuscripts

## Feasibility of Aerosol Drug Delivery to Sleeping Infants

Israel Amirav<sup>1,5</sup>MD, Michael T. Newhouse<sup>4</sup>MD., MSc, FRCP(C), Anthony Luder<sup>1</sup>MD,  
Asaf Halamish<sup>2</sup>, Hamza Omar<sup>3</sup>, Miguel Gorenberg<sup>3</sup>MD

1. Pediatric Department, Ziv Medical Center, Faculty of Medicine, Bar-Ilan University, Safed, Israel
2. Technosaf, Karkur, Israel
3. Nuclear Medicine Department, Ziv Medical Center, Safed,, Israel
4. Firestone Institute for Respiratory Health, St. Joseph's Hospital, McMaster University, Hamilton, Ontario, Canada.
5. Corresponding author: Pediatric Department, University of Alberta, Edmonton, Canada  
Phone: 780-8840296, E mail: [amirav@012.net.il](mailto:amirav@012.net.il)

**Short title:** Aerosol delivery during sleep

**Key words:** Aerosol, face-mask, sleep, deposition, compliance

**Clinical Trial registry:** NCT01120938

Total word count: 2479

## Abstract

**Objectives:** Delivery of inhaled medications to infants is usually very demanding and is often associated with crying and mask rejection. It has been suggested that aerosol administration during sleep may be an attractive alternative. Previous studies in sleeping children were disappointing as most of the children awoke and rejected the treatment.

The SootherMask™ (SM) is a new, gentle and innovative approach for delivering inhaled medication to infants and toddlers. The present pilot study describes the feasibility of administering inhaled medications during sleep using the SM.

**Design:** Prospective observational study

**Setting:** Out patients

**Participants:** Thirteen sleeping infants with recurrent wheezing who regularly used pacifiers and were <12 months old.

**Intervention:** Participants inhaled technetium<sup>99m</sup>DTPA-labeled normal saline aerosol delivered via a Respimat® Soft Mist Inhaler (SMI) (Boehringer Ingelheim, Germany) and SM + InspiraChamber® (IC; InspiRx Inc., New Jersey).

**Outcomes:** The two major outcomes were the acceptability of the treatment and the lung deposition (% of emitted dose)

**Results:** All infants who fulfilled the inclusion criteria successfully received the SM treatment during sleep without difficulty. Mean lung deposition ( $\pm$ SD) averaged  $1.6\pm 0.5\%$  in the right lung.

**Conclusions:** This study demonstrated that the combination of Respimat, InspiraChamber® and SootherMask™ was able to administer aerosol therapy to all the sleeping infants who were regular pacifier users with good lung deposition. Provision of aerosols during sleep is advantageous since all of the sleeping children accepted the mask and ensuing aerosol therapy under these

1  
2  
3 conditions, in contrast to previous studies that resulted in frequent mask rejection  
4 using currently available devices.  
5  
6

7 Word count: 253  
8  
9  
10  
11  
12  
13

### 14 **Strengths**

- 15 • Delivery of inhaled medications to infants is often associated with crying  
16 and mask rejection. Treatment during sleep may be an attractive  
17 alternative yet previous studies failed to confirm this approach as most of  
18 the infants awoke during treatment.  
19
- 20 • The present study describes a novel approach to overcoming these  
21 problems during sleep.  
22
- 23 • Treatment during sleep by means of a unique mask which includes the  
24 infants' own pacifier, was accepted by all infants with no awakening and  
25 improved lung deposition.  
26  
27  
28  
29  
30

### 31 **Limitations**

- 32 • Only infants who regularly used pacifiers were enrolled, thus these results  
33 may not be generally applicable.  
34
- 35 • As the study involved scintigraphy, no control infants using conventional  
36 masks could be included.  
37  
38  
39  
40  
41  
42  
43  
44  
45  
46  
47  
48  
49  
50  
51  
52  
53  
54  
55  
56  
57  
58  
59  
60

## Introduction

Delivery of inhaled medications to awake infants and toddlers is often very demanding and is frequently associated with considerable crying and rejection of the mask. It was suggested that aerosol therapy during sleep may be an attractive alternative. An *in-vitro* study suggested that since sleep is associated with more regular breathing patterns, and lung targeting of aerosol is greater during sleep, this may translate into improved *in vivo* results.[1]

A previous real life study using a pressurized metered dose inhaler (pMDI) with a valved aerosol holding chamber (VHC) in young children,[2] provided disappointing results; 69% of the children awoke during aerosol administration, there was poor compliance and negligible benefit. No similar study followed this failure and a recent Canadian report discourages parents from this practice.[3]

The SootherMask® (SM) is a novel approach for delivering inhaled medication to infants (4). The SM utilizes the infant's own pacifier (or the teat of an infant formula bottle), whose nipple is inserted through a slot in the anterior wall of the mask. The infant, sucking on the mask, keeps the mask sealed to its facial contours, by means of sub-atmospheric pressure, with little additional applied force and can nasally inhale the medication generated by a nebulizer or from a metered dose inhaler (MDI)+ VHC attached to the SM. By virtue of its design the SM can initially be applied to the face without the VHC or nebulizer attached. The infant can retain the SM for prolonged periods of time and subsequent gentle mating of the VHC with MDI or nebulizer rarely upsets the infant. Pilot observations suggested a high degree of acceptance of the SM in

1  
2  
3 sleeping infants who appear to regard it as being no different from their pacifier  
4  
5 alone.  
6

7  
8 The present study describes the feasibility of administering inhaled medications  
9  
10 during sleep using the SM. Infants, shortly after falling asleep, were given 99m  
11  
12 Tc in normal saline as placebo aerosolized medication using the SM attached to a  
13  
14 VHC and both right lung and total lung deposition were evaluated  
15  
16 scintigraphically. Both acceptability of the treatment and fractional lung  
17  
18 deposition served as the primary outcomes.  
19  
20

## 21 22 **Methods**

23  
24 This was part of larger study that explored the relationship between use of  
25  
26 pacifiers and reduction in sudden infant death syndrome mortality  
27  
28 (NCT01120938). The infants received the Respimat- generated radiolabeled  
29  
30 aerosol through a SootherMask attached to a valved holding chamber  
31  
32 (InspiraChamber®[IC]) (InspiRx Inc, NJ USA) and their lung aerosol deposition  
33  
34 was measured scintigraphically.  
35  
36

37  
38 Inclusion criteria: Infants (Age 0-12 months) who were prescribed intermittent or  
39  
40 regular inhaled therapy by a paediatric pulmonologist because of recurrent (>3x  
41  
42 within the past 2 months) episodes of wheezing that responded to bronchodilator  
43  
44 treatments, and who were regular users of pacifiers (at least two hours/day of  
45  
46 pacifier use per parents' report). Patients had to be asymptomatic for at least 2  
47  
48 weeks prior to the study. Demographic details are shown in Table 1.  
49  
50

51  
52 Exclusion criteria: Patients whose parents reported a history or symptoms of  
53  
54 airway abnormalities (eg, previous airway surgery, tracheotomy, obstructive  
55  
56 sleep apnoea, snoring, anatomical anomalies of mouth palate nose, pharynx and  
57  
58  
59  
60



1  
2  
3 trachea) as well as those with chronic cardiopulmonary disease such as  
4  
5 bronchopulmonary dysplasia, congenital heart disease, immune deficiency, or  
6  
7 cystic fibrosis.  
8

9  
10 Procedures:

11  
12  
13 99mTc labelled aerosol generated by the Respimat SMI was administered to the  
14  
15 infants via the IC+SM. The Respimat is powered by compressed air produced by  
16  
17 means of a spring-driven piston within a small cylinder and generates a slowly  
18  
19 moving aerosol bolus into the IC. The medication solution reservoir is a  
20  
21 multidose plastic cartridge. We found the Respimat SMI preferable to  
22  
23 pressurized metered dose inhalers (pMDI) because it is possible to readily radio-  
24  
25 label the medication solution in the cartridge. As both pMDI and SMI, would, in  
26  
27 infants, be used with a VHC, the Respimat served as an ideal clinical surrogate.  
28  
29 For each trial, the SMI cartridge was filled with 3.0 mL of 99m Tc-labelled  
30  
31 normal saline. Addition of 99m Tc has no physical effect on aerosol  
32  
33 characteristics.[5]  
34  
35  
36

37  
38 After priming the Respimat by discharging the inhaler 5 times to a hooded  
39  
40 exhaust system the emitted dose in terms of radioactive counts was measured by  
41  
42 placing bacterial filters over the mouthpiece of the SMI and firing 5 puffs  
43  
44 directly into the filter. The filters were immediately placed in a well counter  
45  
46 (Capintec, Ramsey New Jersey, USA) and were evaluated each morning (x4) for  
47  
48 reproducibility.  
49

50  
51  
52 Infants arrived at the Nuclear Medicine department in the morning and were fed.  
53  
54 The care-giver inserted the infants' pacifier into the SM which was then offered  
55  
56 and accepted. They were put down to sleep sucking on the pacifier nipple in the  
57  
58  
59  
60

1  
2  
3 SM. Treatment commenced within 10 minutes after the infant fell asleep. The  
4  
5 average time from arrival to sleep in this strange environment ranged between  
6  
7 half and one and a half hour. The Respimat was inserted into the back of the IC,  
8  
9 and the 'mouthpiece' of the IC was gently 'docked' into the orifice of the SM  
10  
11 sealed to the infant's face by its suction on the pacifier nipple. Two successive  
12  
13 'puffs' from the Respimat, each followed by one minute of tidal breathing, were  
14  
15 then fired into the IC and the mask-VHC-inhaler combination was kept on the  
16  
17 infant's face, by the care giver, for one minute (see Figure 1 and Video1). This  
18  
19 ensured complete evacuation of the aerosol from the VHC.[6] The SM+VHC  
20  
21 were then removed.  
22  
23  
24

25  
26 The infant was placed supine under a double (anterior and posterior) plate  
27  
28 scanner (Symbia, Siemens GMBH, Munich, Germany) which enabled image  
29  
30 acquisition without moving the infant or the cameras. Scintigraphic scans of 60  
31  
32 seconds duration were obtained and gamma camera counts (corrected for decay  
33  
34 and tissue attenuation) of both the anterior and the posterior chest were measured  
35  
36 as previously reported [7]. Similarly counts were measured for the VHC and  
37  
38 mask to account for all the emitted dose. The tissue attenuation factor was  
39  
40 determined based on our own experience with similar age infants (8). In brief, a  
41  
42 hollow acrylic disc, filled with a solution of a known amount of  $^{99m}\text{Tc}$  (37–74  
43  
44 MBq) served as the flood source. The square root of the ratio of transmission  
45  
46 scan counts obtained without the infant ( $N_o$ ) to the geometric mean of the counts  
47  
48 with the infant ( $N_t$ ) provided the attenuation correction factor ( $\sqrt{N_o/N_t}$ ).

49  
50 The following regions of interest (ROIs) were evaluated: 1. Upper airway, 2.  
51  
52 Stomach and 3. Lungs. Aerosol deposition in each of these regions was  
53  
54  
55  
56  
57  
58  
59  
60

1  
2  
3 expressed as the percent of the total radioactivity previously emitted (2 puffs)  
4  
5 from the Respimat.  
6  
7

8  
9  
10  
11  
12  
13  
14  
15  
16  
17  
18  
19  
20  
21  
22  
23  
24  
25  
26  
27  
28  
29  
30  
31  
32  
33  
34  
35  
36  
37  
38  
39  
40  
41  
42  
43  
44  
45  
46  
47  
48  
49  
50  
51  
52  
53  
54  
55  
56  
57  
58  
59  
60

Treatments were administered in a special room within the nuclear medicine department, used only for this purpose. Only the patient's parent and physician were allowed in the room. Radioactivity protection monitoring was carried out regularly and following each study, to ensure that no excess radioactivity was present in the room following the treatments. To avoid contamination of the infant's chest and the environment during treatment, which would interfere with lung scintigraphy, the infant's chest and the VHC were enclosed in a special disposable large volume nylon wrap which was removed immediately prior to imaging.

The radiation dose of  $^{99m}\text{Tc}$  aerosol used in this study was calculated according to the Medical Internal Radiation Dose Committee [9]. The dose of  $^{99m}\text{Tc}$  to be given to each patient determined before the inhalation procedure was found to be  $15\mu\text{Ci}/\text{kg}$  [10]. As inhalation exposure is 0.05 RAD/mCi, or 0.00075 RAD/Kg, the maximum exposure for a 20 kg child was 0.015 RAD. This is equivalent to the radiation received during normal cosmic-ray exposure of 3 weeks or a 12 hour flight and is much lower than the dose used in diagnostic imaging procedures.  $^{99m}\text{Tc}$  is a pure gamma emitter and has a 6 hour physical half-life.[9]

The deposition method suggested here has been in use clinically world-wide for several decades and has been used in a number of previous paediatric studies [7,11]. It has regularly received ethics committee approval in the past and approval was obtained for this study from the local hospital research ethics

committee (#0007-09-ZIV) and the Ministry of Health in Israel (#920090101).

Parents provided written informed consent.

## Results

Thirteen infants were enrolled. Ten infants completed the study. Reasons for non-completion were: One infant did not fall asleep during the observation period; One infant awoke after completing aerosol administration and due to excessive movement, image acquisition could not be undertaken, although aerosol administration had apparently been achieved; The third infant was subsequently found to be sick with a respiratory illness. She showed abnormally high deposition in only one lung and was therefore excluded. All the infants accepted the treatment without mask rejection and no leaks were observed reflecting a good mask to face seal. All infants were asleep flat and supine during their scintigraphic image acquisition.

A typical scintigram is shown in Figure 2. Lung deposition results for the 10 patients are shown in Table 1.

Right Lung deposition in all 10 infants ranged between 0.83 and 2.37 % of the total delivered dose with a mean of  $1.61 \pm 0.56$  %. The mean deposition in both lungs (which includes oesophageal and carinal deposition) was 4.17 %. The amount of drug deposited in the upper airway averaged 16.7% and in the stomach 1.4%. There was no correlation between deposition and age of the infants.

## Discussion

The present study demonstrates that aerosol administration to infants while asleep is a successful way to achieve potentially 'therapeutic' lung deposition when treatment is accomplished by means of a VHC attached to a calming and relatively non-intrusive mask such as the SM. All of the infants readily accepted the treatment with little difficulty and did not awaken, cry or demonstrate fear of the mask or the subsequent aerosol therapy.

Previous studies have stressed the difficulty of delivering inhaled medications to infants and it has been suggested that sleep may provide a non-threatening opportunity for aerosol administration to them. Furthermore, compared to the awake state, sleep is associated with slower and more regular breathing, and a lower inspiratory flow velocity [1], factors that have been shown to improve aerosol delivery to the lungs. Administration of inhaled medication to infants and toddlers during sleep may thus be a good alternative, particularly if they are uncooperative while awake. Murakami [12] demonstrated, in seven sedated sleepy infants, that scintigraphic deposition of nebulized aerosol appeared significantly better than when they were wide awake. The mean deposition during sleep appeared as good as that in co-operative older (3-14 years) awake children.

In an aerosol 'therapy' study, Janssens et al [1] recorded the breathing patterns of awake and sleeping babies (age  $11 \pm 5.1$  months), then applied the results by means of a breathing simulator. They captured the delivered aerosol (generated by MDI and delivered into a VHC) on filters located at the tracheal port of an infant airway model, the Sophia Anatomical Infant Nose-Throat (SAINT) model.

1  
2  
3 They showed that treatment during 'sleep' greatly improved VHC aerosol  
4 delivery and almost doubled the lung dose compared to the 'awake' state;  $11.3 \pm$   
5  $3.9$  compared to  $6.5 \pm 3.2 \mu\text{g}$  of a  $200 \mu\text{g}$  total delivered dose (5.5% vs 3.2%).  
6  
7  
8

9  
10 These promising 'in vitro' results were somewhat contradicted during attempts to  
11 translate them to real life conditions. Noble et al [13] showed that although mask  
12 VHC aerosol administration during sleep was successful in most of the infants  
13 and toddlers that he studied, a subgroup of 17% of the patients awakened during  
14 the procedure. In a more recent study that assessed the effects of sleep on aerosol  
15 delivery by VHC, it was found that 70% of infants awoke during application of  
16 the mask and 75% of those became distressed and uncooperative. Not  
17 surprisingly, the delivered dose in this study was only about half of that in awake,  
18 cooperative infants.[2] Based on these disappointing studies, a recent Canadian  
19 guideline discourages parents from attempting to deliver aerosols to their infants  
20 during sleep.[3]  
21  
22  
23  
24  
25  
26  
27  
28  
29  
30  
31  
32  
33  
34  
35

36 The SM is a new face mask concept that integrates the infant's *own* pacifier into  
37 the treatment process. The mask has evidence-based facial contours and an  
38 extremely small dead space (18.2 ml) resulting from 3D computerized face  
39 analysis technology developed with the assistance of the Computer Science  
40 department at Technion University [4]. When infants suck on the mask-  
41 integrated pacifier, the rim of the mask becomes gently sealed to their face,  
42 mainly by suction on the pacifier and with minimal, if any, additional applied  
43 force.  
44  
45  
46  
47  
48  
49  
50  
51  
52  
53

54 We postulate that the very gentle touch of the contoured mask rim is thus not  
55 considered as intrusive and frightening as currently available masks that require  
56  
57  
58  
59  
60

1  
2  
3 application of considerable force in order to achieve a good seal [14] and also fail  
4  
5 to provide the calming effect of the infant's familiar pacifier. We have previously  
6  
7 shown adequate lung deposition when nebulized drug was administered to awake  
8  
9 infants through the SM [15]. Nebulization may require up to 15 min or more  
10  
11 which may, with current masks, be too long for the infant to tolerate. Treatment  
12  
13 by VHC+MDI is much faster and less expensive per dose than nebulisation and  
14  
15 the overall duration of therapy (taking into account preparation and cleaning) is  
16  
17 considerably shorter (<5 min vs. >20 min).  
18  
19

20  
21 It has been recently shown that no more than 2-3 breaths are necessary following  
22  
23 each puff to empty the VHC in young children [6] and thus actual aerosol  
24  
25 administration time, after application of the SM, can be as short as 10-15 seconds  
26  
27 per puff. The current study is the first to employ the SM in combination with a  
28  
29 VHC. Lung deposition in the present study was comparable to previous reports in  
30  
31 infants (7,8,11,12,15) and is likely to exert comparable clinical efficacy.  
32  
33

34  
35 Respiratory symptoms such as cough and breathlessness in infancy are common  
36  
37 during sleep.[16] The present study supports, not only the use of chronic anti-  
38  
39 inflammatory treatments (e.g. inhaled cortico-steroids) during sleep, but also  
40  
41 suggests that the use of acute treatments such as inhaled bronchodilators at the  
42  
43 time of an episode of nocturnal breathlessness and coughing may be rapidly  
44  
45 effective, possibly without awakening the child. Parents can be assured that using  
46  
47 this technique the infants will most likely accept and receive the necessary  
48  
49 treatment. Thus, the use of the SM is more likely than in the past to allow aerosol  
50  
51 therapy to be administered to infants during sleep without awakening them.  
52  
53  
54  
55  
56  
57  
58  
59  
60

1  
2  
3 Furthermore, given the high success rate with the SM approach, paediatricians  
4 may now more confidently prescribe VHC+SM to achieve more rapid and  
5 acceptable aerosol therapeutics, instead of providing more expensive  
6 compressor+nebulizer systems and solution vials that involve about 20 minutes  
7 of administration time and the need to clean the nebulizer after the treatment is  
8 complete. Use of nebulizers requires that a mask be applied to the face for a  
9 much longer period of time which is more likely to arouse the infant, further  
10 adding to the its distress, or the need to resort to the 'blow-by' technique that  
11 provides a relatively small and unpredictable dose of aerosol medication to the  
12 child.  
13  
14  
15  
16  
17  
18  
19  
20  
21  
22  
23  
24

25  
26 The lack of control subjects using currently available *conventional* masks is  
27 acknowledged as a limitation of the present study and a control group was  
28 originally incorporated. However, we felt that it would be unethical and  
29 unjustified to expose an additional control group of infants to scintigraphy,  
30 particularly since several historical scintigraphic studies are available. Another  
31 limitation may be our enrolment only of infants who regularly use pacifiers and a  
32 future study in non-pacifier users is certainly warranted. Similarly, the possibility  
33 that sleep may be disturbed when infants are sick need to be also considered in  
34 the future.  
35  
36  
37  
38  
39  
40  
41  
42  
43  
44  
45  
46

47 This pilot study with the SM is clinically important as it demonstrates a unique,  
48 innovative and apparently effective approach to providing infants and toddlers with  
49 aerosol therapy during sleep. It has the potential for encouraging pediatricians to use  
50 this technique in future clinical studies including more patients.  
51  
52  
53  
54  
55  
56  
57  
58  
59  
60



**Acknowledgments:**

The authors thank Dr Joanna MacLean for her valuable suggestions.

**Funding source:** None

**Financial Disclosure:** Dr. Newhouse is the consulting Chief Medical Officer of InspiRx Inc, developer of the SootherMask®. All other authors have indicated they have no financial relationships relevant to this article to disclose.

**Contributors' Statement**

Israel Amirav: Dr. Amirav conceptualized and designed the study, coordinated and supervised data collection, drafted the initial manuscript, reviewed and approved the final manuscript as submitted.

Michael T. Newhouse: Dr. Newhouse was involved in the study design, reviewed and approved the final manuscript as submitted.

Anthony S. Luder: Dr. Luder reviewed and approved the final manuscript as submitted.

Asaf Halamish: Mr. Halamish was involved in the study design, designed the data collection instruments, and coordinated and supervised data collection. He reviewed and approved the final manuscript as submitted.

Hamza Omar: Mr. Omar carried out the nuclear medicine studies and initial analyses, reviewed and approved the final manuscript as submitted.

Miguel Gorenberg: Dr. Gorenberg was involved in the study design, designed the nuclear data collection, reviewed and approved the final manuscript as submitted.

**Conflict of Interest:** Israel Amirav and Michael Newhouse have patents rights for devices for delivering aerosols to infants including those in the current study. The other authors have no conflicts of interest relevant to this article to disclose.

**Data Sharing Statement:** No additional data

**List of abbreviations**

MDI- metered dose inhaler

VHC- valved aerosol holding chamber

DTPA-Diethylene Triamine Pentacetic Acid

SM- SootherMask

IC- InspiraChamber

**Licence for Publication statement:**

The Corresponding Author has the right to grant on behalf of all authors and does grant on behalf of all authors, an exclusive licence (or non-exclusive for government employees) on a worldwide basis to the BMJ Group and co-owners or contracting owning societies (where published by the BMJ Group on their behalf), and its Licensees to permit this article (if accepted) to be published in BMJ Open and any other BMJ Group products and to exploit all subsidiary rights, as set out in our licence

For peer review only

## References

1. Janssens HM, van der Wiel EC, Verbraak AF et al. Aerosol therapy and the fighting toddler: is administration during sleep an alternative? *J Aerosol Med.* 2003;16(4):395-400.
2. Esposito-Festen J, Ijsselstijn H, Hop W et al. Aerosol therapy by pressured metered-dose inhaler-spacer in sleeping young children: to do or not to do? *Chest.* 2006;130(2):487-92.
3. Smith C, Goldman RD. Nebulizers versus pressurized metered-dose inhalers in preschool children with wheezing. *Can Fam Physician.* 2012;58(5):528-30.
4. Amirav I, Luder AS, Halamish A, et al. Design of Aerosol Face Masks for Children Using Computerized 3D Face Analysis. *J Aerosol Med Pulm Drug Deliv.* 2013 Sep 28.
5. Newman SP. Scintigraphic assessment of therapeutic aerosols. *Crit Rev Ther Drug Carrier Syst* 1993;10:65-109.
6. Schultz A, Le Souëf TJ, Venter A et al. Aerosol inhalation from spacers and valved holding chambers requires few tidal breaths for children. *Pediatrics.* 2010;126(6):e1493-8.
7. Amirav I, Balanov I, Gorenberg M, et al. Nebulizer Hood Compared to Mask in Wheezy Infants: Aerosol Therapy Without Tears! , *Arch Dis Child* 2003;88:719-723.
8. Amirav I, Balanov I, Gorenberg M, et al. Beta Agonist Aerosol Distribution in RSV Bronchiolitis in Infants. *J Nucl Med*, 2002; 43: 487-491
9. Atkins HL, Weber DA, Susskind H et al. MIRD dose estimate report no. 16: radiation absorbed dose from technetium-99m-diethylenetriaminepentaacetic acid aerosol. *J Nucl Med* 1992;33:1717-1719.
10. Egli DF. Pediatric radiopharmaceutical dosages. In *Clinical Practice of Nuclear Medicine*. Edited by Taylor A and Datz FL. Churchill Livingstone 1991,p450.
11. Tal A, Golan H, Grauer N, et al. Deposition pattern of radiolabeled salbutamol inhaled from a metered-dose inhaler by means of a spacer with mask in young children with airway obstruction. *J Pediatr* 1996;128:479-484.
12. Murakami G, Igarashi T, Adachi Y et al. Measurement of bronchial hyperreactivity in infants and preschool children using a new method. *Ann Allergy* 1990;64:383-7.

- 1  
2  
3 13. Noble V, Ruggins NR, Everard ML et al. Inhaled budesonide for  
4 chronic wheezing under 18 months of age. *Arch Dis Child* 1992;67:285-  
5 288.  
6  
7 14. Shah SA, Berlinski AB, Rubin BK. Force-dependent static dead space of face  
8 masks used with holding chambers. *Respir Care* 2006;51:140-4.  
9  
10 15. Amirav I, Luder A, Chleechel A et al. Lung aerosol deposition in suckling  
11 infants. *Arch Dis Child* 2012; 97(6):497-501.  
12  
13 16. Clarisse B, Demattei C, Nikasinovic L et al. Bronchial obstructive  
14 phenotypes in the first year of life among Paris birth cohort infants. *Pediatr*  
15 *Allergy Immunol* 2009;20:126–33.  
16  
17  
18  
19  
20  
21  
22  
23  
24  
25  
26  
27  
28  
29  
30  
31  
32  
33  
34  
35  
36  
37  
38  
39  
40  
41  
42  
43  
44  
45  
46  
47  
48  
49  
50  
51  
52  
53  
54  
55  
56  
57  
58  
59  
60

**Table 1**

Individual Deposition values (% of emitted dose)

| <u>Pt. #</u> | <u>Age (m)</u> | <u>Gender</u> | <u>Rt. lung</u> | <u>Both</u>  | <u>Stomach</u> | <u>Upper</u>  |
|--------------|----------------|---------------|-----------------|--------------|----------------|---------------|
|              |                |               |                 | <u>Lungs</u> |                | <u>airway</u> |
| 1            | 6.4            | M             | <b>0.99</b>     | 4.16         | 0.09           | 7.8           |
| 2            | 3.9            | F             | <b>1.44</b>     | 2.97         | 0.72           | 16.9          |
| 3            | 6.4            | M             | <b>0.83</b>     | 2.38         | 3.29           | 25.84         |
| 4            | 7.1            | F             | <b>1.94</b>     | 5.26         | 2.11           | 15.59         |
| 5            | 5.4            | F             | <b>1.47</b>     | 4.51         | 1.26           | 9.76          |
| 6            | 11.7           | M             | <b>2.37</b>     | 6.33         | 0.8            | 32.81         |
| 7            | 5.0            | F             | <b>2.29</b>     | 4.88         | 1.58           | 16.5          |
| 8            | 10.8           | F             | <b>1.4</b>      | 4.02         | 1.13           | 8.37          |
| 9            | 5.4            | M             | <b>1.19</b>     | 2.41         | 2.52           | 15.01         |
| 10           | 5.4            | M             | <b>2.23</b>     | 4.75         | 0.72           | 18.95         |
| Mean         | 9.28           |               | <b>1.61</b>     | 4.17         | 1.42           | 16.75         |
| SD           | 0.68           |               | 0.56            | 1.27         | 0.97           | 7.81          |

1  
2  
3  
4 Figures and Video Legend  
5

6 Figure 1:  
7

8 Photograph illustrating the method of aerosol administration to a sleeping infant  
9 showing the Respimat inhaler, InspiraChamber and SootherMask™  
10  
11

12  
13  
14 Figure 2:  
15

16 A typical scintigram, the green dashed circle denotes the stomach, the blue dots  
17 denote upper airways, and solid yellow- right lung.  
18  
19

20  
21 Video:  
22

23 Video illustrating the method of aerosol administration to a sleeping infant  
24 showing the Respimat inhaler, InspiraChamber and SootherMask™  
25  
26  
27  
28  
29  
30  
31  
32  
33  
34  
35  
36  
37  
38  
39  
40  
41  
42  
43  
44  
45  
46  
47  
48  
49  
50  
51  
52  
53  
54  
55  
56  
57  
58  
59  
60

1  
2  
3  
4  
5  
6 **Feasibility of Aerosol Drug Delivery to Sleeping Infants**  
7 **Aerosol**  
8 **delivery to infants *without tears* – Back to Sleep!**  
9

10  
11  
12  
13  
14 Israel Amirav<sup>1,5</sup>MD, Michael T. Newhouse<sup>4</sup> MD., MSc, FRCP(C), Anthony Luder<sup>1</sup>MD,  
15 Asaf Halamish<sup>2</sup>, Hamza Omar<sup>3</sup>, Miguel Gorenberg<sup>3</sup>MD  
16

- 17  
18  
19  
20 1. ~~Corresponding author~~, Pediatric Department, Ziv Medical Center, Faculty of Medicine,  
21 Bar-Ilan University, Safed, Israel ~~Phone: 780-8840296, E-mail: amirav@012.net.il~~  
22  
23 2. Technosaf, Karkur, Israel  
24  
25 3. Nuclear Medicine Department, Ziv Medical Center, Safed,, Israel  
26  
27 4. Firestone Institute for Respiratory Health, St. Joseph's Hospital, McMaster University,  
28 Hamilton, Ontario, Canada.  
29  
30 4.5. ~~Corresponding author: Pediatric Department, University of Alberta, Edmonton, Canada~~  
31 ~~Phone: 780-8840296, E-mail: amirav@012.net.il~~  
32  
33  
34

35 **Short title:** Aerosol delivery during sleep

36 **Key words:** Aerosol, face-mask, sleep, deposition, compliance

37 **Funding source:** None

38  
39 **Financial Disclosure:** Dr. Newhouse is the consulting Chief Medical Officer of InspiRx  
40 Inc, developer of the SootherMask®. All other authors have indicated they have no  
41 financial relationships relevant to this article to disclose.  
42

43 **Conflict of Interest:** Israel Amirav and Michael Newhouse have patents rights for  
44 devices for delivering aerosols to infants including those in the current study. The other  
45 authors have no conflicts of interest relevant to this article to disclose.  
46

47 **Clinical Trial registry:** NCT01120938  
48

49 Total word count: 2479  
50

51  
52  
53 There is no additional data available  
54  
55  
56  
57  
58  
59  
60

1  
2  
3  
4  
5  
6  
7  
8 Contributors' Statement  
9

10 Israel Amirav: Dr. Amirav conceptualized and designed the study, coordinated  
11 and supervised data collection, drafted the initial manuscript, reviewed and  
12 approved the final manuscript as submitted.  
13

14 Michael T. Newhouse: Dr. Newhouse was involved in the study design, reviewed  
15 and approved the final manuscript as submitted.  
16

17 Anthony S. Luder: Dr. Luder reviewed and approved the final manuscript as  
18 submitted.  
19

20 Asaf Halamish: Mr. Halamish was involved in the study design, designed the  
21 data collection instruments, and coordinated and supervised data collection. He  
22 reviewed and approved the final manuscript as submitted.  
23

24 Hamza Omar: Mr. Omar carried out the nuclear medicine studies and initial  
25 analyses, reviewed and approved the final manuscript as submitted.  
26

27 Miguel Gorenberg: Dr. Gorenberg was involved in the study design, designed the  
28 nuclear data collection, reviewed and approved the final manuscript as submitted.  
29  
30

31 List of abbreviations  
32

33 MDI- metered dose inhaler  
34

35 VHC- valved aerosol holding chamber  
36

37 DTPA-Diethylene Triamine Pentacetic Acid  
38

39 SM- SootherMask  
40

41 IC- InspiraChamber  
42  
43  
44  
45  
46  
47  
48  
49  
50  
51  
52  
53  
54  
55  
56  
57  
58  
59  
60



## Abstract

**Rationale Objectives:** Delivery of inhaled medications to infants is usually very demanding and is often associated with crying and mask rejection. It has been suggested that aerosol administration during sleep may be an attractive alternative. Previous studies in sleeping children were disappointing as most of the children awoke and rejected the treatment.

The SootherMask™ (SM) is a new, gentle and innovative approach for delivering inhaled medication to infants and toddlers. The present pilot study describes the feasibility of administering inhaled medications during sleep using the SM. ~~The two major outcomes of this study were the acceptability of the treatment and the lung deposition (% of emitted dose)~~

**Methods and Results Design:** Prospective observational study

**Setting:** Out patients

**Participants:** Thirteen sleeping infants with recurrent wheezing who regularly used pacifiers and were <12 months old ~~were studied~~.

**Intervention:** Participants inhaled technetium99mDTPA-labeled normal saline aerosol delivered via a Respimat® Soft Mist Inhaler (SMI) (Boehringer Ingelheim, Germany) and SM + InspiraChamber® (IC; InspiRx Inc., New Jersey).

**Outcomes:** The two major outcomes were the acceptability of the treatment and the lung deposition (% of emitted dose)

~~Right lung aerosol deposition was measured scintigraphically using technetium99mDTPA-labeled normal saline aerosol delivered via a Respimat® Soft Mist Inhaler (SMI) (Boehringer Ingelheim, Germany) and SM + InspiraChamber® (IC; InspiRx Inc., New Jersey).~~

**Results:** All infants who fulfilled the inclusion criteria successfully received the SM treatment during sleep without difficulty. Mean lung deposition ( $\pm$ SD) averaged  $1.6\pm 0.5\%$  in the right lung.

Formatted: Font: Bold

1  
2  
3  
4  
5  
6 **Conclusions:** This study demonstrated that the combination of Respimat,  
7 InspiraChamber® and SootherMask™ was able to administer aerosol therapy to  
8 all the sleeping infants who were regular pacifier users with good lung  
9 deposition. Provision of aerosols during sleep is advantageous since all of the  
10 sleeping children accepted the mask and ensuing aerosol therapy under these  
11 conditions, in contrast to previous studies that resulted in frequent mask rejection  
12 using currently available devices.  
13  
14  
15  
16  
17  
18  
19

20 Word count: ~~250~~253  
21  
22  
23  
24  
25  
26  
27  
28  
29  
30  
31  
32  
33  
34  
35  
36  
37  
38  
39  
40  
41  
42  
43  
44  
45  
46  
47  
48  
49  
50  
51  
52  
53  
54  
55  
56  
57  
58  
59  
60

### Strengths

- Delivery of inhaled medications to infants is often associated with crying and mask rejection. Treatment during sleep may be an attractive alternative yet previous studies failed to confirm this approach as most of the infants awoke during treatment.
- The present study describes a novel approach to overcoming these problems during sleep.
- Treatment during sleep by means of a unique mask which includes the infants' own pacifier, was accepted by all infants with no awakening and improved lung deposition.

### Limitations

- Only infants who regularly used pacifiers were enrolled, thus these results may not be generally applicable.
- As the study involved scintigraphy, no control ~~healthy~~ infants using conventional masks could be included.

## Introduction

Delivery of inhaled medications to awake infants and toddlers is often very demanding and is frequently associated with considerable crying and rejection of the mask. It was suggested that aerosol therapy during sleep may be an attractive alternative. An *in-vitro* study suggested that since sleep is associated with more regular breathing patterns, and lung targeting of aerosol is greater during sleep, this may translate into improved *in vivo* results.[1]

A previous real life study using a pressurized metered dose inhaler (pMDI) with a valved aerosol holding chamber (VHC) in young children,[2] provided disappointing results; 69% of the children awoke during aerosol administration, there was poor compliance and negligible benefit. No similar study followed this failure and a recent Canadian report discourages parents from this practice.[3]

The SootherMask® (SM) is a novel approach for delivering inhaled medication to infants (4). The SM utilizes the infant's own pacifier (or the teat of an infant formula bottle), whose nipple is inserted through a slot in the anterior wall of the mask. The infant, sucking on the mask, keeps the mask sealed to its facial contours, by means of sub-atmospheric pressure, with little additional applied force and can nasally inhale the medication generated by a nebulizer or from a metered dose inhaler (MDI)+ VHC attached to the SM. By virtue of its design the SM can initially be applied to the face without the VHC or nebulizer attached. The infant can retain the SM for prolonged periods of time and subsequent gentle mating of the VHC with MDI or nebulizer rarely upsets the infant. Pilot observations suggested a high degree of acceptance of the SM in

1  
2  
3  
4  
5  
6 sleeping infants who appear to regard it as being no different from their pacifier  
7  
8 alone.

9  
10 The present study describes the feasibility of administering inhaled medications  
11 during sleep using the SM. Infants, shortly after falling asleep, were given 99m  
12 Tc in normal saline as placebo aerosolized medication using the SM attached to a  
13 VHC and both right lung and total lung deposition were evaluated  
14  
15 scintigraphically. Both acceptability of the treatment and fractional lung  
16  
17 deposition served as the primary outcomes.  
18  
19  
20  
21  
22

### 23 **Methods**

24  
25 This was part of larger study that explored the relationship between use of  
26  
27 pacifiers and reduction in sudden infant death syndrome mortality  
28  
29 (NCT01120938). The infants received the Respimat- generated radiolabeled  
30  
31 aerosol through a SootherMask attached to a valved holding chamber  
32  
33 (InspiraChamber®[IC]) (InspiRx Inc, NJ USA) and their lung aerosol deposition  
34  
35 was measured scintigraphically.  
36

37  
38 Inclusion criteria: Infants (Age 0-12 months) who were prescribed intermittent or  
39  
40 regular inhaled therapy by a paediatric pulmonologist because of recurrent (>3x  
41  
42 within the past 2 months) episodes of wheezing that responded to bronchodilator  
43  
44 treatments, and who were regular users of pacifiers (at least two hours/day of  
45  
46 pacifier use per parents' report). Patients had to be asymptomatic for at least 2  
47  
48 weeks prior to the study. Demographic details are shown in Table 1.  
49

50  
51 Exclusion criteria: Patients whose parents reported a history or symptoms of  
52  
53 airway abnormalities (eg, previous airway surgery, tracheotomy, obstructive  
54  
55 sleep apnoea, snoring, anatomical anomalies of mouth palate nose, pharynx and  
56

1  
2  
3  
4  
5  
6 trachea) as well as those with chronic cardiopulmonary disease such as  
7  
8 bronchopulmonary dysplasia, congenital heart disease, immune deficiency, or  
9  
10 cystic fibrosis.

11  
12 Procedures:

13  
14  
15 99mTc labelled aerosol generated by the Respimat SMI was administered to the  
16  
17 infants via the IC+SM. The Respimat is powered by compressed air produced by  
18  
19 means of a spring-driven piston within a small cylinder and generates a slowly  
20  
21 moving aerosol bolus into the IC. The medication solution reservoir is a  
22  
23 multidose plastic cartridge. We found the Respimat SMI preferable to  
24  
25 pressurized metered dose inhalers (pMDI) because it is possible to readily radio-  
26  
27 label the medication solution in the cartridge. As both pMDI and SMI, would, in  
28  
29 infants, be used with a VHC, the Respimat served as an ideal clinical surrogate.  
30  
31 For each trial, the SMI cartridge was filled with 3.0 mL of 99m Tc-labelled  
32  
33 normal saline. Addition of 99m Tc has no physical effect on aerosol  
34  
35 characteristics.[5]

36  
37  
38 After priming the Respimat by discharging the inhaler 5 times to a hooded  
39  
40 exhaust system the emitted dose in terms of radioactive counts was measured by  
41  
42 placing bacterial filters over the mouthpiece of the SMI and firing 5 puffs  
43  
44 directly into the filter. The filters were immediately placed in a well counter  
45  
46 (Capintec, Ramsey New Jersey, USA) and were evaluated each morning (x4) for  
47  
48 reproducibility.

49  
50 Infants arrived at the Nuclear Medicine department in the morning and were fed.  
51  
52 The care-giver inserted the infants' pacifier into the SM which was then offered  
53  
54 and accepted. They were put down to sleep sucking on the pacifier nipple in the  
55

1  
2  
3  
4  
5  
6 SM. Treatment commenced within 10 minutes after the infant fell asleep. The  
7  
8 average time from arrival to sleep in this strange environment ranged between  
9  
10 half and one and a half hour. The Respimat was inserted into the back of the IC,  
11  
12 and the 'mouthpiece' of the IC was gently 'docked' into the orifice of the SM  
13  
14 sealed to the infant's face by its suction on the pacifier nipple. Two successive  
15  
16 'puffs' from the Respimat, each followed by one minute of tidal breathing, were  
17  
18 then fired into the IC and the mask-VHC-inhaler combination was kept on the  
19  
20 infant's face, by the care giver, for one minute (see Figure 1 and Video1). This  
21  
22 ensured complete evacuation of the aerosol from the VHC.[6] The SM+VHC  
23  
24 were then removed.

25  
26 The infant was placed supine under a double (anterior and posterior) plate  
27  
28 scanner (Symbia, Siemens GMBH, Munich, Germany) which enabled image  
29  
30 acquisition without moving the infant or the cameras. Scintigraphic scans of 60  
31  
32 seconds duration were obtained and gamma camera counts (corrected for decay  
33  
34 and tissue attenuation) of both the anterior and the posterior chest were measured  
35  
36 as previously reported [7]. Similarly counts were measured for the VHC and  
37  
38 mask to account for all the emitted dose. The tissue attenuation factor was  
39  
40 determined based on our own experience with similar age infants (8). In brief, a  
41  
42 hollow acrylic disc, filled with a solution of a known amount of  $^{99m}\text{Tc}$  (37–74  
43  
44 MBq) served as the flood source. The square root of the ratio of transmission  
45  
46 scan counts obtained without the infant ( $N_0$ ) to the geometric mean of the counts  
47  
48 with the infant ( $N_t$ ) provided the attenuation correction factor ( $\sqrt{N_0/N_t}$ ).

49 The following regions of interest (ROIs) were evaluated: 1. Upper airway, 2.  
50  
51 Stomach and 3. Lungs. Aerosol deposition in each of these regions was  
52  
53  
54  
55  
56  
57  
58  
59  
60

Formatted: Font color: Auto

Formatted: Font color: Auto

1  
2  
3  
4  
5  
6 expressed as the percent of the total radioactivity previously emitted (2 puffs)  
7  
8 from the Respimat.  
9

10  
11 Treatments were administered in a special room within the nuclear medicine  
12 department, used only for this purpose. Only the patient's parent and physician  
13 were allowed in the room. Radioactivity protection monitoring was carried out  
14 regularly and following each study, to ensure that no excess radioactivity was  
15 present in the room following the treatments. To avoid contamination of the  
16 infant's chest and the environment during treatment, which would interfere with  
17 lung scintigraphy—, the infant's chest and the VHC were enclosed in a special  
18 disposable large volume nylon wrap which was removed immediately prior to  
19 imaging.  
20  
21

22  
23  
24  
25  
26  
27  
28  
29 The radiation dose of  $^{99m}\text{Tc}$  aerosol used in this study was calculated according  
30 to the Medical Internal Radiation Dose Committee [9]. The dose of  $^{99m}\text{Tc}$  to be  
31 given to each patient determined before the inhalation procedure was found to be  
32  $15\mu\text{Ci}/\text{kg}$  [10]. As inhalation exposure is 0.05 RAD/mCi, or 0.00075 RAD/Kg, the  
33 maximum exposure for a 20 kg child was 0.015 RAD. This is equivalent to the  
34 radiation received during normal cosmic-ray exposure of 3 weeks or a 12 hour  
35 flight and is much lower than the dose used in diagnostic imaging procedures.  
36  
37  
38  
39  
40  
41  
42  
43  
44  
45  
46  
47  
48  
49  
50  
51  
52  
53  
54  
55  
56  
57  
58  
59  
60

The deposition method suggested here has been in use clinically world-wide for  
several decades and has been used in a number of previous paediatric studies  
[7,11]. It has regularly received ethics committee approval in the past and  
approval was obtained for this study from the local hospital research [ethics](#)



1  
2  
3  
4  
5  
6 committee (#0007-09-ZIV) and the Ministry of Health in Israel (#920090101).

7  
8 Parents provided written informed consent.

9  
10  
11 **Results**

12  
13 Thirteen infants were enrolled. Ten infants completed the study. Reasons for  
14 non-completion were: One infant did not fall asleep during the observation  
15 period; One infant awoke after completing aerosol administration and due to  
16 excessive movement, image acquisition could not be undertaken, although  
17 aerosol administration had apparently been achieved; The third infant was  
18 subsequently found to be sick with a respiratory illness. She showed abnormally  
19 high deposition in only one lung and was therefore excluded. All the infants  
20 accepted the treatment without mask rejection and no leaks were observed  
21 reflecting a good mask to face seal. All infants were asleep flat and supine during  
22 their scintigraphic image acquisition.  
23  
24  
25  
26  
27  
28  
29  
30  
31  
32

33  
34 A typical scintigram is shown in Figure 2. Lung deposition results for the 10  
35 patients are shown in Table 1.

36  
37  
38 Right Lung deposition in all 10 infants ranged between 0.83 and 2.37 % of the  
39 total delivered dose with a mean of  $1.61 \pm 0.56$  %. The mean deposition in both  
40 lungs (which includes oesophageal and carinal deposition) was 4.17 %. The  
41 amount of drug deposited in the upper airway averaged 16.7% and in the  
42 stomach 1.4%. There was no correlation between deposition and age of the  
43 infants.  
44  
45  
46  
47  
48  
49  
50  
51  
52  
53  
54  
55  
56  
57  
58  
59  
60

## Discussion

The present study demonstrates that aerosol administration to infants while asleep is a successful way to achieve potentially 'therapeutic' lung deposition when treatment is accomplished by means of a VHC attached to a calming and relatively non-intrusive mask such as the SM. All of the infants readily accepted the treatment with little difficulty and did not awaken, cry or demonstrate fear of the mask or the subsequent aerosol therapy.

Previous studies have stressed the difficulty of delivering inhaled medications to infants and it has been suggested that sleep may provide a non-threatening opportunity for aerosol administration to them. Furthermore, compared to the awake state, sleep is associated with slower and more regular breathing, and a lower inspiratory flow velocity [1], factors that have been shown to improve aerosol delivery to the lungs. Administration of inhaled medication to infants and toddlers during sleep may thus be a good alternative, particularly if they are uncooperative while awake. Murakami [12] demonstrated, in seven sedated sleepy infants, that scintigraphic deposition of nebulized aerosol appeared significantly better than when they were wide awake. The mean deposition during sleep appeared as good as that in co-operative older (3-14 years) awake children.

In an aerosol 'therapy' study, Janssens et al [1] recorded the breathing patterns of awake and sleeping babies (age  $11 \pm 5.1$  months), then applied the results by means of a breathing simulator. They captured the delivered aerosol (generated by MDI and delivered into a VHC) on filters located at the tracheal port of an infant airway model, the Sophia Anatomical Infant Nose-Throat (SAINT) model.

1  
2  
3  
4  
5  
6 They showed that treatment during 'sleep' greatly improved VHC aerosol  
7 delivery and almost doubled the lung dose compared to the 'awake' state;  $11.3 \pm$   
8  $3.9$  compared to  $6.5 \pm 3.2 \mu\text{g}$  of a  $200 \mu\text{g}$  total delivered dose (5.5% vs 3.2%).  
9

10  
11  
12 These promising 'in vitro' results were somewhat contradicted during attempts to  
13 translate them to real life conditions. Noble et al [13] showed that although mask  
14 VHC aerosol administration during sleep was successful in most of the infants  
15 and toddlers that he studied, a subgroup of 17% of the patients awakened during  
16 the procedure. In a more recent study that assessed the effects of sleep on aerosol  
17 delivery by VHC, it was found that 70% of infants awoke during application of  
18 the mask and 75% of those became distressed and uncooperative. Not  
19 surprisingly, the delivered dose in this study was only about half of that in awake,  
20 cooperative infants.[2] Based on these disappointing studies, a recent Canadian  
21 guideline discourages parents from attempting to deliver aerosols to their infants  
22 during sleep.[3]  
23  
24  
25  
26  
27  
28  
29  
30  
31  
32  
33  
34

35 The SM is a new face mask concept that integrates the infant's *own* pacifier into  
36 the treatment process. The mask has evidence-based facial contours and an  
37 extremely small dead space (18.2 ml) resulting from 3D computerized face  
38 analysis technology developed with the assistance of the Computer Science  
39 department at Technion University [4]. When infants suck on the mask-  
40 integrated pacifier, the rim of the mask becomes gently sealed to their face,  
41 mainly by suction on the pacifier and with minimal, if any, additional applied  
42 force.  
43  
44  
45  
46  
47  
48  
49  
50

51 We postulate that the very gentle touch of the contoured mask rim is thus not  
52 considered as intrusive and frightening as currently available masks that require  
53  
54  
55

1  
2  
3  
4  
5  
6 application of considerable force in order to achieve a good seal [14] and also fail  
7  
8 to provide the calming effect of the infant's familiar pacifier. We have previously  
9  
10 shown adequate lung deposition when nebulized drug was administered to awake  
11  
12 infants through the SM [15]. Nebulization may require up to 15 min or more  
13  
14 which may, with current masks, be too long for the infant to tolerate. Treatment  
15  
16 by VHC+MDI is much faster and less expensive per dose than nebulisation and  
17  
18 the overall duration of therapy (taking into account preparation and cleaning) is  
19  
20 considerably shorter (<5 min vs. >20 min).  
21

22  
23 It has been recently shown that no more than 2-3 breaths are necessary following  
24  
25 each puff to empty the VHC in young children [6] and thus actual aerosol  
26  
27 administration time, after application of the SM, can be as short as 10-15 seconds  
28  
29 per puff. The current study is the first to employ the SM in combination with a  
30  
31 VHC. Lung deposition in the present study was comparable to previous reports in  
32  
33 infants (7,8,11,12,15) and is likely to exert comparable clinical efficacy.  
34

35  
36 Respiratory symptoms such as cough and breathlessness in infancy are common  
37  
38 during sleep.[16] The present study supports, not only the use of chronic anti-  
39  
40 inflammatory treatments (e.g. inhaled cortico-steroids) during sleep, but also  
41  
42 suggests that the use of acute treatments such as inhaled bronchodilators at the  
43  
44 time of an episode of nocturnal breathlessness and coughing may be rapidly  
45  
46 effective, possibly without awaking the child. Parents can be assured that using  
47  
48 this technique the infants will most likely accept and receive the necessary  
49  
50 treatment. Thus, the use of the SM is more likely than in the past to allow aerosol  
51  
52 therapy to be administered to infants during sleep without awaking them.  
53  
54  
55  
56  
57  
58  
59  
60

1  
2  
3  
4  
5  
6 Furthermore, given the high success rate with the SM approach, paediatricians  
7  
8 may now more confidently prescribe VHC+SM to achieve more rapid and  
9  
10 acceptable aerosol therapeutics, instead of providing more expensive  
11  
12 compressor+nebulizer systems and solution vials that involve about 20 minutes  
13  
14 of administration time and the need to clean the nebulizer after the treatment is  
15  
16 complete. Use of nebulizers requires that a mask be applied to the face for a  
17  
18 much longer period of time which is more likely to arouse the infant, further  
19  
20 adding to the its distress, or the need to resort to the 'blow-by' technique that  
21  
22 provides a relatively small and unpredictable dose of aerosol medication to the  
23  
24 child.

25  
26 The lack of control subjects using currently available *conventional* masks is  
27  
28 acknowledged as a limitation of the present study and a control group was  
29  
30 originally incorporated. However, we felt that it would be unethical and  
31  
32 unjustified to expose an additional-control group of infants to scintigraphy,  
33  
34 particularly since several historical scintigraphic studies are available. Another  
35  
36 limitation may be our enrolment only of infants who regularly use pacifiers and a  
37  
38 future study in non-pacifier users is certainly warranted. Similarly, the possibility  
39  
40 that sleep may be disturbed when infants are sick need to be also considered in  
41  
42 the future.

43  
44 This pilot study with the SM is ~~we think~~ clinically important as it demonstrates  
45  
46 a unique, innovative and apparently effective approach to providing infants and  
47  
48 toddlers with aerosol therapy during sleep. It has the potential for encouraging  
49  
50 pediatricians to use this technique in future clinical studies including more  
51  
52 patients.

Formatted: Font: Italic

## References

1. Janssens HM, van der Wiel EC, Verbraak AF et al. Aerosol therapy and the fighting toddler: is administration during sleep an alternative? *J Aerosol Med*. 2003;16(4):395-400.
2. Esposito-Festen J, Ijsselstijn H, Hop W et al. Aerosol therapy by pressured metered-dose inhaler-spacer in sleeping young children: to do or not to do? *Chest*. 2006;130(2):487-92.
3. Smith C, Goldman RD. Nebulizers versus pressurized metered-dose inhalers in preschool children with wheezing. *Can Fam Physician*. 2012;58(5):528-30.
4. Amirav I, Luder AS, Halamish A, Raviv D, Kimmel R, Waisman D, Newhouse MT. Design of Aerosol Face Masks for Children Using Computerized 3D Face Analysis. *J Aerosol Med Pulm Drug Deliv*. 2013 Sep 28.
5. Newman SP. Scintigraphic assessment of therapeutic aerosols. *Crit Rev Ther Drug Carrier Syst* 1993;10:65-109.
6. Schultz A, Le Souëf TJ, Venter A et al. Aerosol inhalation from spacers and valved holding chambers requires few tidal breaths for children. *Pediatrics*. 2010;126(6):e1493-8.
7. Amirav I, Balanov I, Gorenberg M, et al. Nebulizer Hood Compared to Mask in Wheezy Infants: Aerosol Therapy Without Tears! , *Arch Dis Child* 2003;88:719-723.
8. Amirav I, Balanov I, Gorenberg M, Luder AS, Newhouse MT, Groshar D. Beta Agonist Aerosol Distribution in RSV Bronchiolitis in Infants. *J Nucl Med*, 2002; 43: 487-491
9. Atkins HL, Weber DA, Susskind H et al. MIRD dose estimate report no. 16: radiation absorbed dose from technetium-99m-diethylenetriaminepentaacetic acid aerosol. *J Nucl Med* 1992;33:1717-1719.
10. Egli DF. Pediatric radiopharmaceutical dosages. In *Clinical Practice of Nuclear Medicine*. Edited by Taylor A and Datz FL. Churchill Livingstone 1991,p450.
11. Tal A, Golan H, Grauer N, et al. Deposition pattern of radiolabeled salbutamol inhaled from a metered-dose inhaler by means of a spacer with mask in young children with airway obstruction. *J Pediatr* 1996;128:479-484.
12. Murakami G, Igarashi T, Adachi Y et al. Measurement of bronchial hyperreactivity in infants and preschool children using a new method. *Ann Allergy* 1990;64:383-7.

1  
2  
3  
4  
5  
6  
7 13. Noble V, Ruggins NR, Everard ML et al. Inhaled budesonide for  
8 chronic wheezing under 18 months of age. *Arch Dis Child* 1992;67:285-  
9 288.

10  
11 14. Shah SA, Berlinski AB, Rubin BK. Force-dependent static dead space of face  
12 masks used with holding chambers. *Respir Care* 2006;51:140-4.

13  
14 15. Amirav I, Luder A, Chleechel A et al. Lung aerosol deposition in suckling  
15 infants. *Arch Dis Child* 2012; 97(6):497-501.

16  
17 16. Clarisse B, Demattei C, Nikasinovic L et al. Bronchial obstructive  
18 phenotypes in the first year of life among Paris birth cohort infants. *Pediatr*  
19 *Allergy Immunol* 2009;20:126-33.

1  
2  
3  
4  
5  
6  
7  
8  
9  
10  
11  
12  
13  
14  
15  
16  
17  
18  
19  
20  
21  
22  
23  
24  
25  
26  
27  
28  
29  
30  
31  
32  
33  
34  
35  
36  
37  
38  
39  
40  
41  
42  
43  
44  
45  
46  
47  
48  
49  
50  
51  
52  
53  
54  
55  
56  
57  
58  
59  
60

Licence for Publication statement:

The Corresponding Author has the right to grant on behalf of all authors and does grant on behalf of all authors, an exclusive licence (or non-exclusive for government employees) on a worldwide basis to the BMJ Group and co-owners or contracting owning societies (where published by the BMJ Group on their behalf), and its Licensees to permit this article (if accepted) to be published in BMJ Open and any other BMJ Group products and to exploit all subsidiary rights, as set out in our licence

For peer review only



**Table 1**

Individual Deposition values (% of emitted dose)

| <u>Pt. #</u> | <u>Age (m)</u> | <u>Gender</u> | <u>Rt. lung</u> | <u>Both<br/>Lungs</u> | <u>Stomach</u> | <u>Upper<br/>airway</u> |
|--------------|----------------|---------------|-----------------|-----------------------|----------------|-------------------------|
| 1            | 6.4            | M             | <b>0.99</b>     | 4.16                  | 0.09           | 7.8                     |
| 2            | 3.9            | F             | <b>1.44</b>     | 2.97                  | 0.72           | 16.9                    |
| 3            | 6.4            | M             | <b>0.83</b>     | 2.38                  | 3.29           | 25.84                   |
| 4            | 7.1            | F             | <b>1.94</b>     | 5.26                  | 2.11           | 15.59                   |
| 5            | 5.4            | F             | <b>1.47</b>     | 4.51                  | 1.26           | 9.76                    |
| 6            | 11.7           | M             | <b>2.37</b>     | 6.33                  | 0.8            | 32.81                   |
| 7            | 5.0            | F             | <b>2.29</b>     | 4.88                  | 1.58           | 16.5                    |
| 8            | 10.8           | F             | <b>1.4</b>      | 4.02                  | 1.13           | 8.37                    |
| 9            | 5.4            | M             | <b>1.19</b>     | 2.41                  | 2.52           | 15.01                   |
| 10           | 5.4            | M             | <b>2.23</b>     | 4.75                  | 0.72           | 18.95                   |
| Mean         | 9.28           |               | <b>1.61</b>     | 4.17                  | 1.42           | 16.75                   |
| SD           | 0.68           |               | 0.56            | 1.27                  | 0.97           | 7.81                    |

1  
2  
3  
4  
5  
6  
7 Figures and Video Legend  
8

9 Figure 1:

10 Photograph illustrating the method of aerosol administration to a sleeping infant  
11 showing the Respimat inhaler, InspiraChamber and SootherMask™  
12  
13

14  
15  
16 Figure 2:

17 A typical scintigram, the green dashed circle denotes the stomach, the blue dots  
18 denote upper airways, and solid yellow- right lung.  
19  
20

21  
22 Video:

23  
24 Video illustrating the method of aerosol administration to a sleeping infant  
25 showing the Respimat inhaler, InspiraChamber and SootherMask™  
26  
27  
28  
29  
30  
31  
32  
33  
34  
35  
36  
37  
38  
39  
40  
41  
42  
43  
44  
45  
46  
47  
48  
49  
50  
51  
52  
53  
54  
55  
56  
57  
58  
59  
60

**Acknowledgments:**

The authors thank Dr Joanna MacLean for her valuable suggestions.

Formatted: Font: Bold

For peer review only

1  
2  
3  
4  
5  
6  
7  
8  
9  
10  
11  
12  
13  
14  
15  
16  
17  
18  
19  
20  
21  
22  
23  
24  
25  
26  
27  
28  
29  
30  
31  
32  
33  
34  
35  
36  
37  
38  
39  
40  
41  
42  
43  
44  
45  
46  
47  
48  
49  
50  
51  
52  
53  
54  
55  
56  
57  
58  
59  
60

1  
2  
3  
4  
5  
6  
7  
8  
9  
10  
11  
12  
13  
14  
15  
16  
17  
18  
19  
20  
21  
22  
23  
24  
25  
26  
27  
28  
29  
30  
31  
32  
33  
34  
35  
36  
37  
38  
39  
40  
41  
42  
43  
44  
45  
46  
47  
48  
49  
50  
51  
52  
53  
54  
55  
56  
57  
58  
59  
60

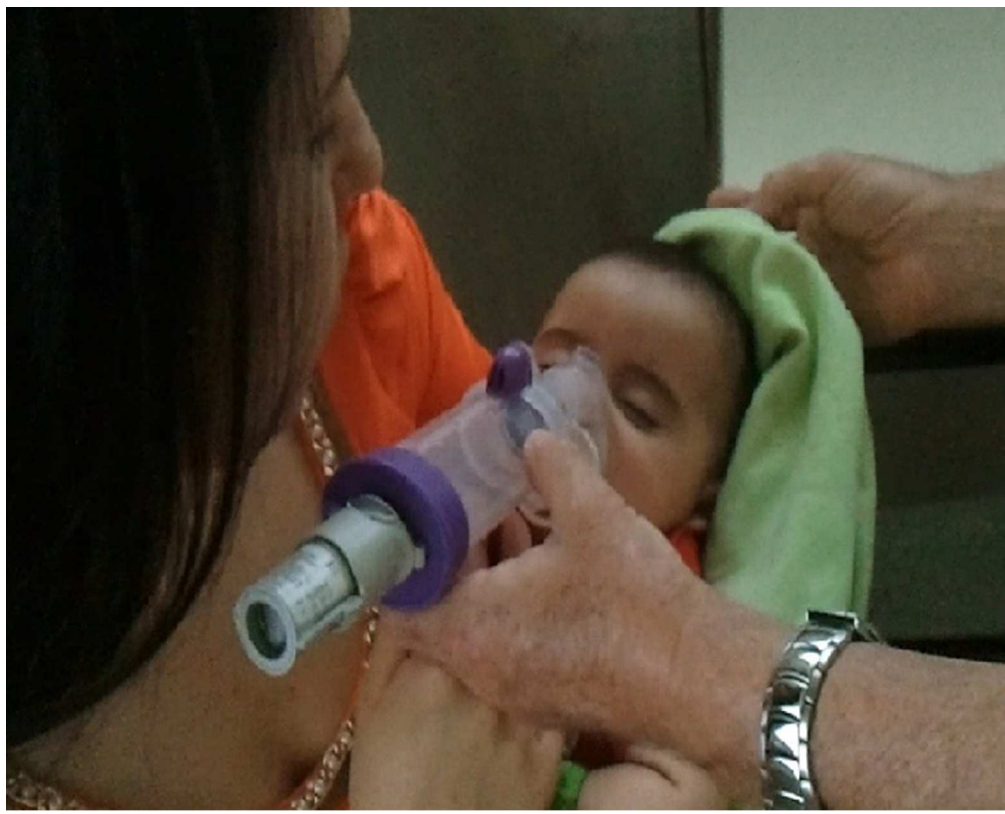

178x143mm (96 x 96 DPI)

ew only

1  
2  
3  
4  
5  
6  
7  
8  
9  
10  
11  
12  
13  
14  
15  
16  
17  
18  
19  
20  
21  
22  
23  
24  
25  
26  
27  
28  
29  
30  
31  
32  
33  
34  
35  
36  
37  
38  
39  
40  
41  
42  
43  
44  
45  
46  
47  
48  
49  
50  
51  
52  
53  
54  
55  
56  
57  
58  
59  
60

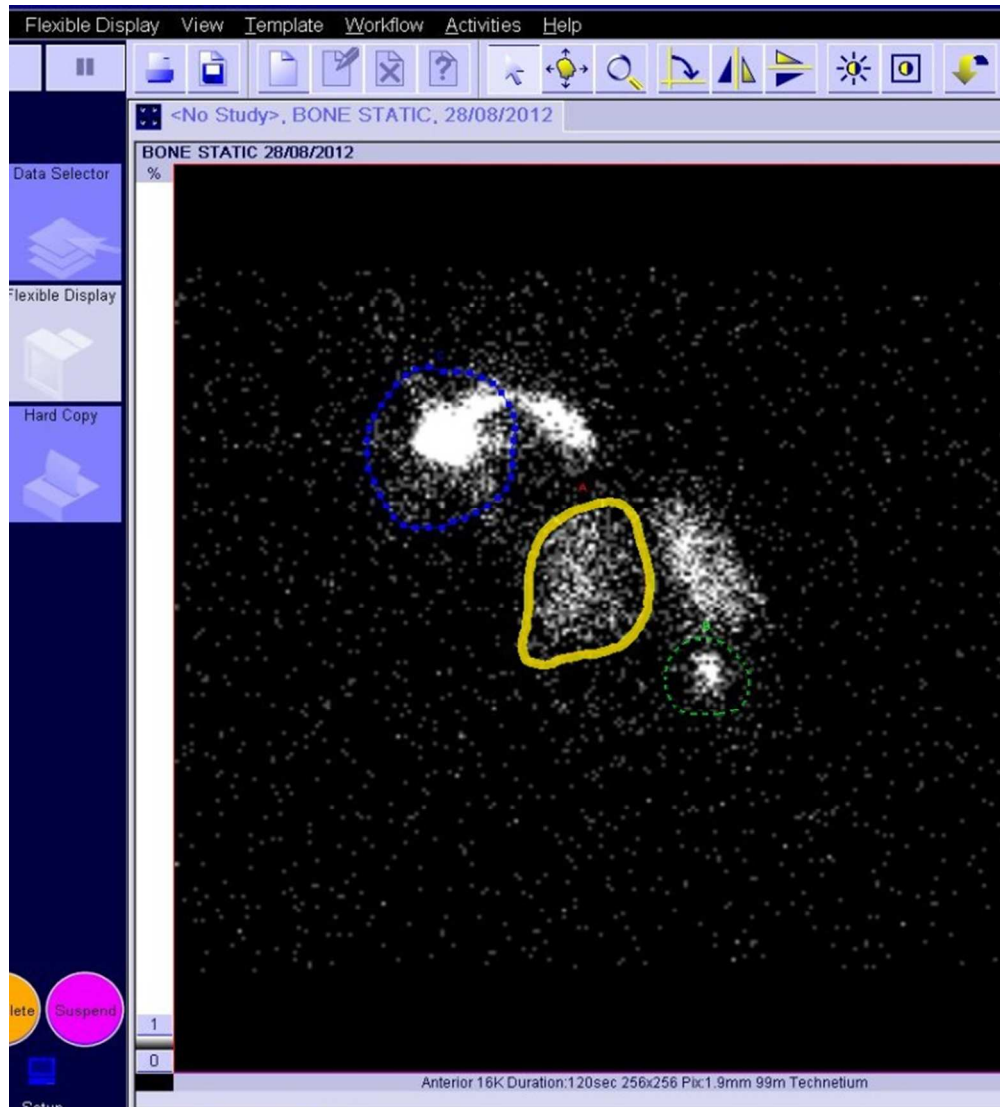

207x228mm (96 x 96 DPI)

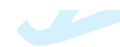

Supplement: bmjopen-2013-004124.draft_revisions.pdf [file bmjopen-2013-004124.draft_revisions.pdf]
